# Supplementary material for: Carotane sesquiterpenoids A–G from the desert endophytic fungus Fusarium sp. HM 166
Source: Royal Society of Chemistry journal article supplement (doi:10.1039/d2ra02762c), 2022-01-01
Supplement: d2ra02762c1.pdf [file d2ra02762c1.pdf]

*Supporting Information*

**Guaiane sesquiterpenoids A–G with cytotoxic activity from the  
desert endophytic fungus *Fusarium* sp. HM 166**

Bing-Wen Zhang,<sup>a</sup> Li Jiang,<sup>a</sup> Xue-Hui Gao,<sup>a</sup> Fei Cao,<sup>a</sup> Xin-hua Lu,<sup>c</sup> Wen-Bin Shen,<sup>c</sup> Xue-Xia Zhang,<sup>c</sup> Fan-Dong Kong,<sup>\*,b</sup> Du-Qiang Luo,<sup>\*,a</sup>

<sup>a</sup> College of Life Science, Key Laboratory of Microbial Diversity Research and Application of Hebei Province, Hebei University, Baoding 071002, People's Republic of China

<sup>b</sup> Key Laboratory of Chemistry and Engineering of Forest Products, State Ethnic Affairs Commission, Guangxi Key Laboratory of Chemistry and Engineering of Forest Products, Guangxi Collaborative Innovation Center for Chemistry and Engineering of Forest Products, School of Chemistry and Chemical Engineering, Guangxi Minzu University, Nanning 530006, Republic of China

<sup>c</sup> New Drug Research & Development Center of North China Pharmaceutical Group Corporation, National Microbial Medicine Engineering & Research Center, Hebei Industry Microbial Metabolic Engineering & Technology Research Center, Key Laboratory for New Drug Screening Technology of Shijiazhuang City, Shijiazhuang 052165, Hebei, China

\*Correspondence: [duqiangluo@163.com](mailto:duqiangluo@163.com) (D.Q. L.); [kongfandong0127@126.com](mailto:kongfandong0127@126.com) (F. D. K.)

## Table of Contents

Figure S1. The 16S rRNA sequence of *Fusarium* sp. HM166

Figure S2-1. The  $^1\text{H}$  NMR spectrum of **1** in  $\text{CD}_3\text{OD}$

Figure S2-2. The  $^{13}\text{C}$  NMR spectrum of **1**

Figure S2-3. The HSQC spectrum of **1**

Figure S2-4. The HMBC spectrum of **1**

Figure S2-5. The  $^1\text{H}$ - $^1\text{H}$  COSY spectrum of **1**

Figure S2-6. The ROESY spectrum of **1**

Figure S2-7. The IR spectrum of **1**

Figure S2-8. The HRESIMS spectrum of **1**

Figure S3-1. The  $^1\text{H}$  NMR spectrum of **2**

Figure S3-2. The  $^{13}\text{C}$  NMR spectrum of **2**

Figure S3-3. The HSQC spectrum of **2**

Figure S3-4. The HMBC spectrum of **2**

Figure S3-5. The  $^1\text{H}$ - $^1\text{H}$  COSY spectrum of **2**

Figure S3-6. The ROESY spectrum of **2**

Figure S3-7. The IR spectrum of **2**

Figure S3-8. The HRESIMS spectrum of **2**

Figure S4-1. The  $^1\text{H}$  NMR spectrum of **3**

Figure S4-2. The  $^{13}\text{C}$  NMR spectrum of **3**

Figure S4-3. The HSQC spectrum of **3**

Figure S4-4. The HMBC spectrum of **3**

Figure S4-5. The  $^1\text{H}$ - $^1\text{H}$  COSY spectrum of **3**

Figure S4-6. The ROESY spectrum of **3**

Figure S4-7. The IR spectrum of **3**

Figure S5-1. The  $^1\text{H}$  NMR spectrum of **4**

Figure S5-2. The  $^{13}\text{C}$  NMR spectrum of **4**

Figure S5-3. The HSQC spectrum of **4**

Figure S5-4. The HMBC spectrum of **4**

Figure S5-5. The  $^1\text{H}$ - $^1\text{H}$  COSY spectrum of **4**

Figure S5-6. The ROESY spectrum of **4**

Figure S5-7. The IR spectrum of **4**

Figure S5-8. The HRESIMS spectrum of **4**

Figure S6-1. The  $^1\text{H}$  NMR spectrum of **5**

Figure S6-2. The  $^{13}\text{C}$  NMR spectrum of **5**  
Figure S6-3. The HSQC spectrum of **5**  
Figure S6-4. The HMBC spectrum of **5**  
Figure S6-5. The  $^1\text{H}$ - $^1\text{H}$  COSY spectrum of **5**  
Figure S6-6. The ROESY spectrum of **5**  
Figure S6-7. The IR spectrum of **5**  
Figure S6-8. The HRESIMS spectrum of **5**

Figure S7-1. The  $^1\text{H}$  NMR spectrum of **6**  
Figure S7-2. The  $^{13}\text{C}$  NMR spectrum of **6**  
Figure S7-3. The HSQC spectrum of **6**  
Figure S7-4. The HMBC spectrum of **6**  
Figure S7-5. The  $^1\text{H}$ - $^1\text{H}$  COSY spectrum of **6**  
Figure S7-6. The ROESY spectrum of **6**  
Figure S7-7. The IR spectrum of **6**  
Figure S7-8. The HRESIMS spectrum of **6**

Figure S8-1. The  $^1\text{H}$  NMR spectrum of **7**  
Figure S8-2. The  $^{13}\text{C}$  NMR spectrum of **7**  
Figure S8-3. The HSQC spectrum of **7**  
Figure S8-4. The HMBC spectrum of **7**  
Figure S8-5. The  $^1\text{H}$ - $^1\text{H}$  COSY spectrum of **7**  
Figure S8-6. The ROESY spectrum of **7**  
Figure S8-7. The IR spectrum of **7**  
Figure S8-8. The HRESIMS spectrum of **7**

Table 1. Cytotoxicity of compounds **1–10** against four tumor cell lines

Table 2. Cytotoxicity of compounds **1–10** against the IDH1<sup>R132H</sup> mutant

Figure S9. Key  $^1\text{H}$ - $^1\text{H}$  and HMBC correlations of **1–7**

Figure S10. Key ROESY correlations of **1–7**

Figure S11. Calculated and experimental electronic circular dichroism (ECD) spectra of **1–7**

TTCCGTAGGTGAACCTGCGGAGGGATCATTACCGAGTTTACAACCTCCCAAACCCCTGTGAACATACCAATT  
GTTGCCTCGGCGGATCAGCCCGCTCCCGGTAAAACGGGACGGCCCGCCAGAGGACCCCTAAACTCTGTTT  
CTATATGTAACCTTCTGAGTAAAACCATAAATAAATCAAACTTTCAACAACGGATCTCTTGGTTCTGGCATC  
GATGAAGAACGCAGCAAAATGCGATAAGTAATGTGAATTGCAGAATTCAGTGAATCATCGAATCTTTGAA  
CGCACATTGCGCCCGCCAGTATTCTGGCGGGCATGCCTGTTTCGAGCGTCATTTCAACCCTCAAGCCCCGG  
GTTTGGTGTGGGGATCGGCGAGCCCTTGCGGCAAGCCGGCCCCGAAATCTAGTGGCGGTCTCGCTGCA  
GCTTCCATTGCGTAGTAGTAAAACCCTCGCAACTGGTACGCGGCGCGCCAAGCCGTAAACCCCCAACTT  
CTGAATGTTGACCTCGGATCAGGTAGGAATACCCGCTGAACTTAAGCATATCAATAAGCGGAGG

Figure S1. The 16S rRNA sequence of *Fusarium* sp. **HM166**

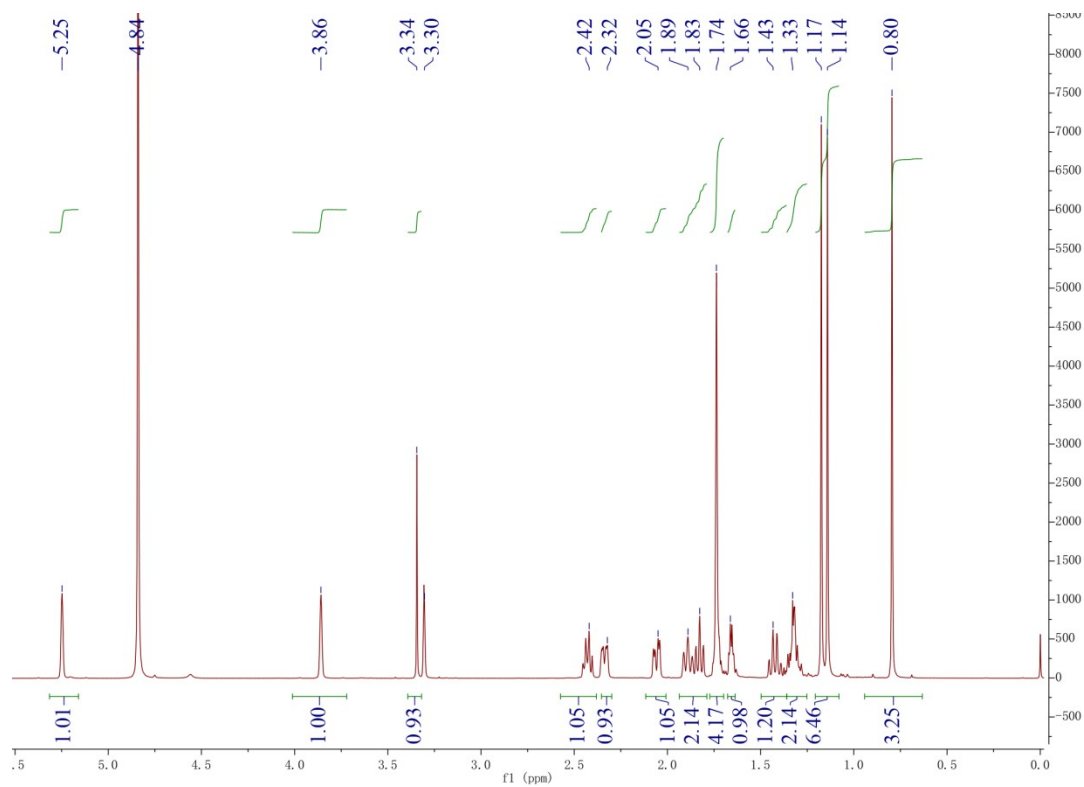

Figure S2-1. The  $^1\text{H}$  NMR spectrum of **1**

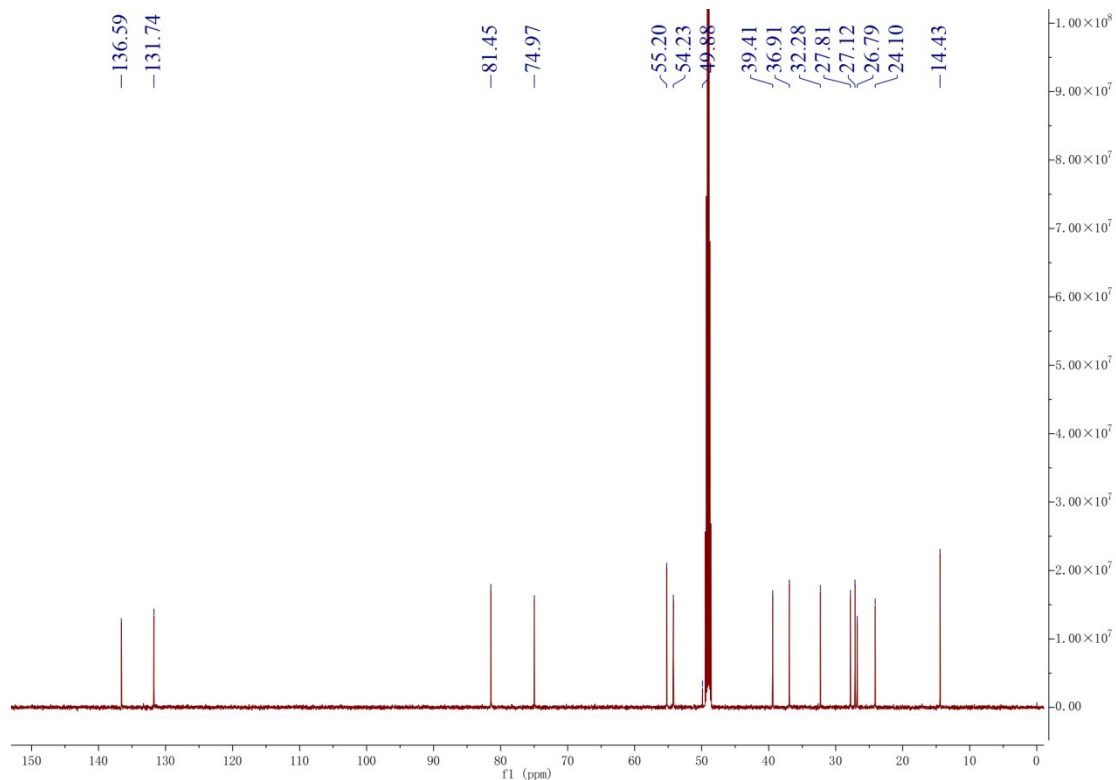

Figure S2-2. The  $^{13}\text{C}$  NMR spectrum of **1**

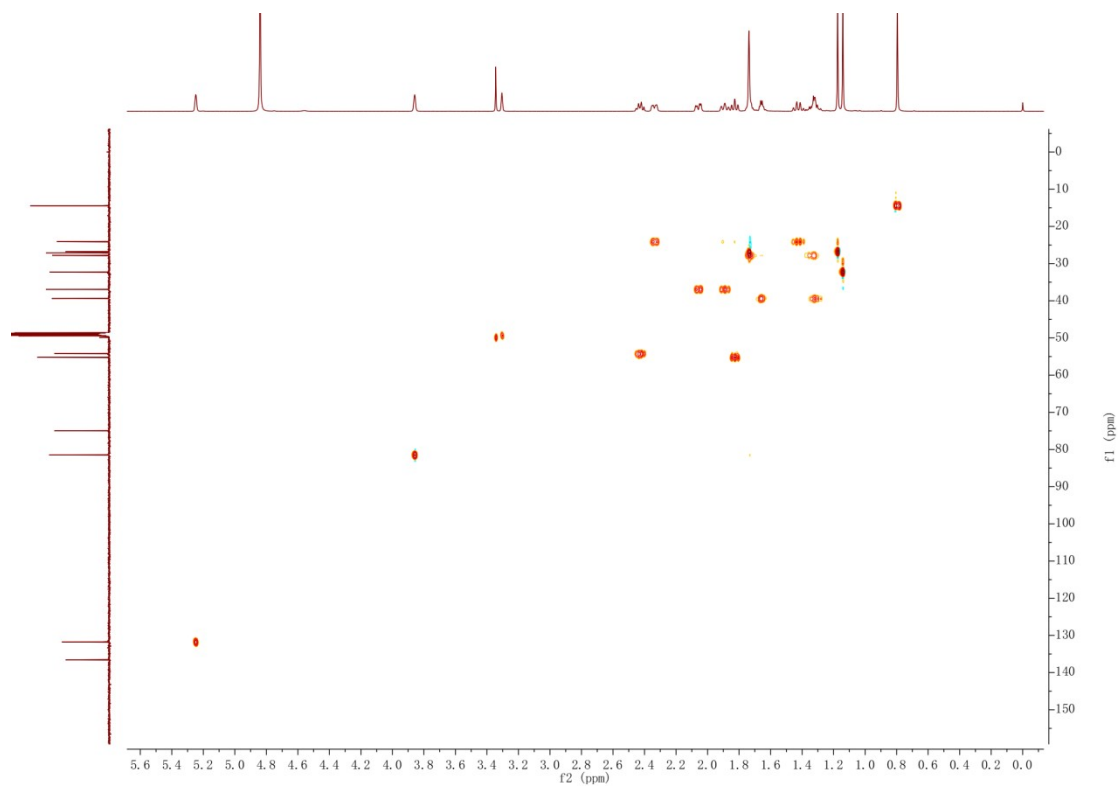

Figure S2-3. The HSQC spectrum of **1**

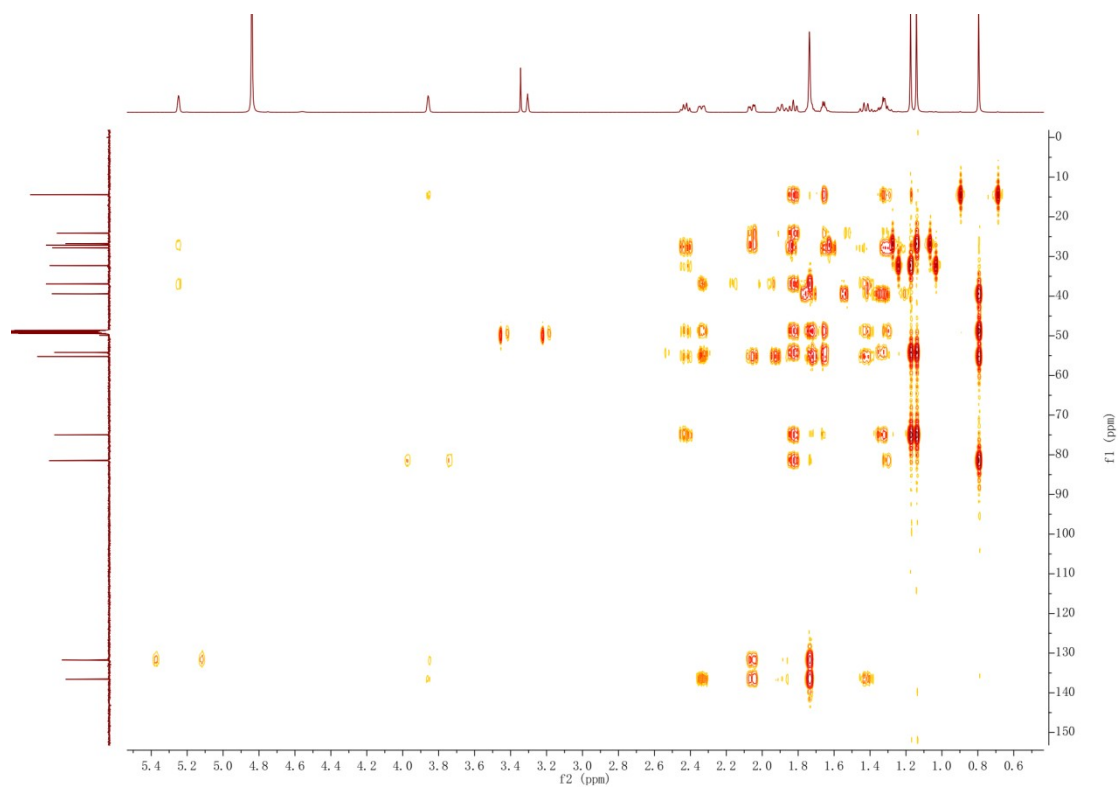

Figure S3-4. The HMBC spectrum of **1**

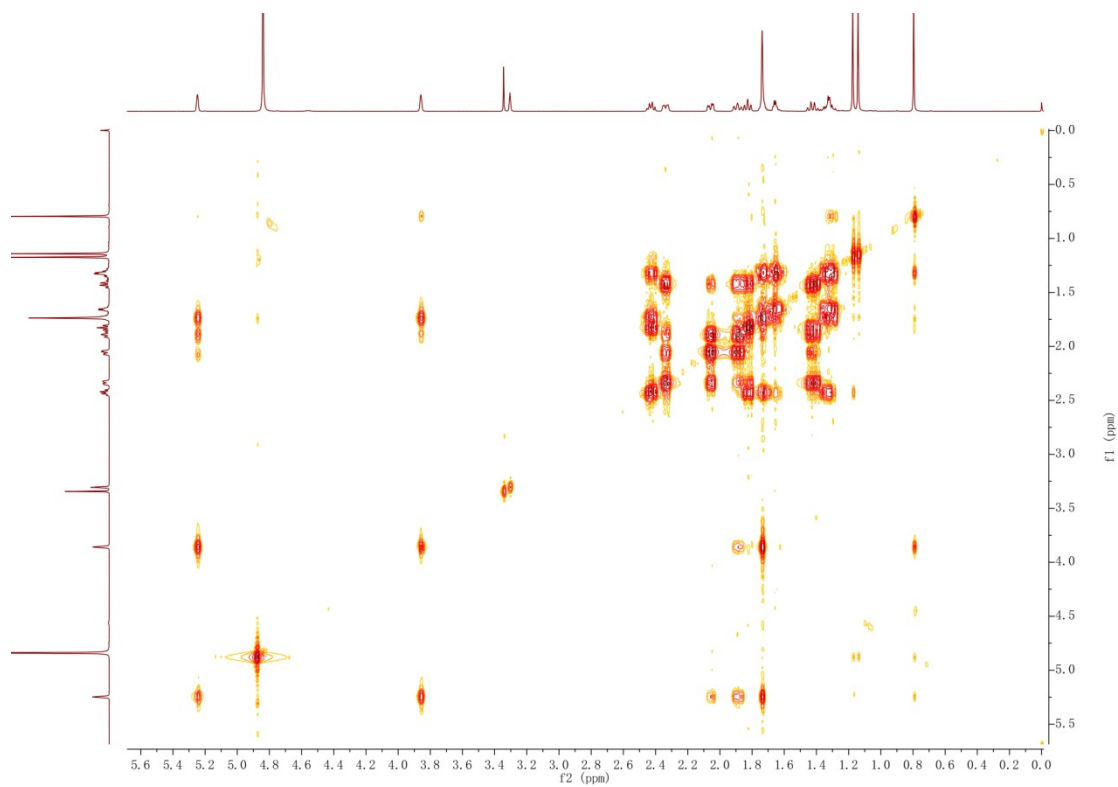

Figure S2-5. The  $^1\text{H}$ - $^1\text{H}$  COSY spectrum of **1**

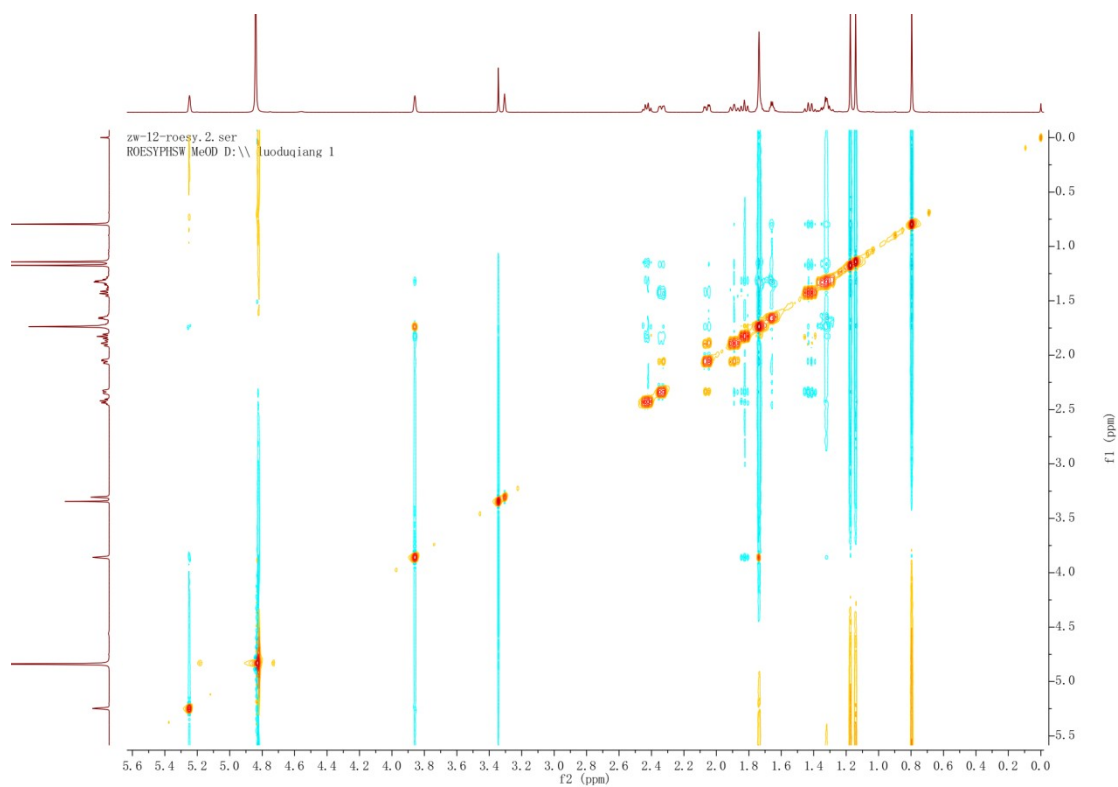

Figure S2-6. The ROESY spectrum of **1**

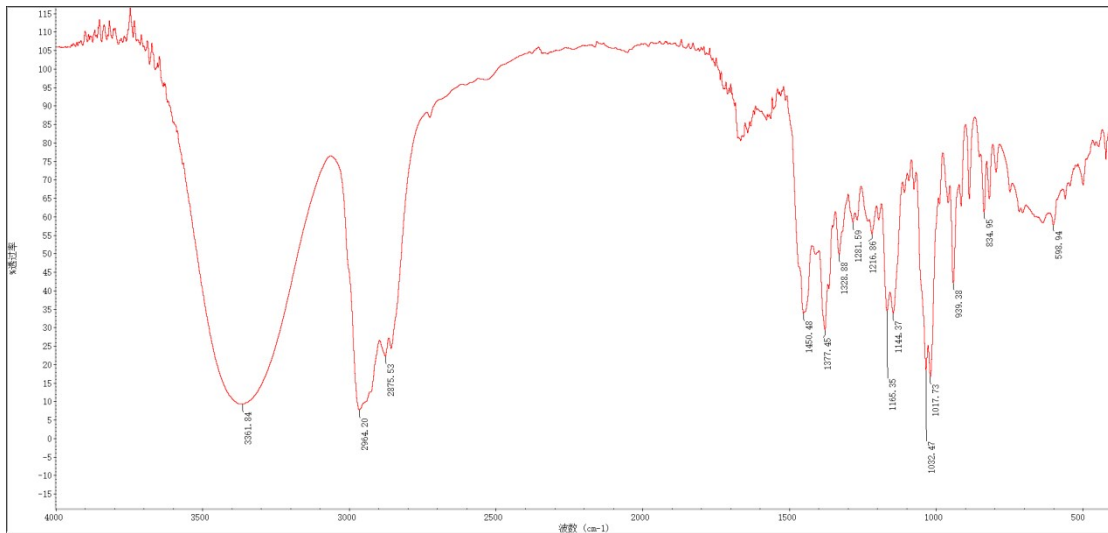

Figure S2-7. The IR spectrum of **1**

T: FTMS + p ESI Full ms [80.0000-1000.0000]

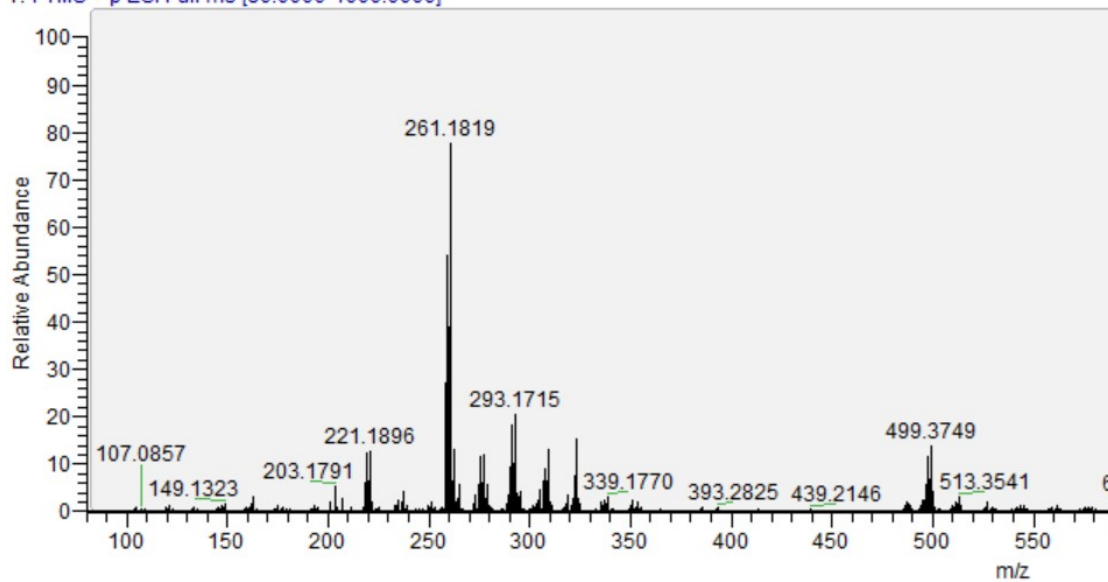

$C_{15}H_{26}O_2Na^+$  Calculated 261.1825 Found 261.1819

Figure S3-8. The HRESIMS spectrum of **1**



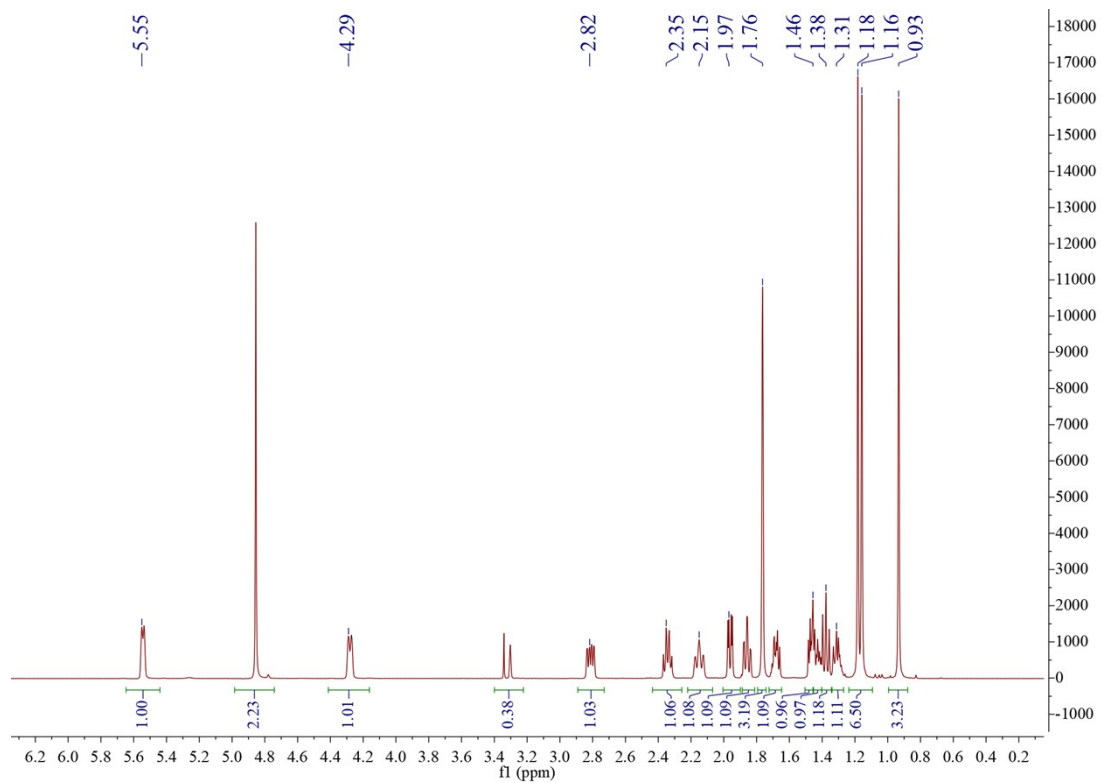

Figure S3-1. The  $^1\text{H}$  NMR spectrum of **2**

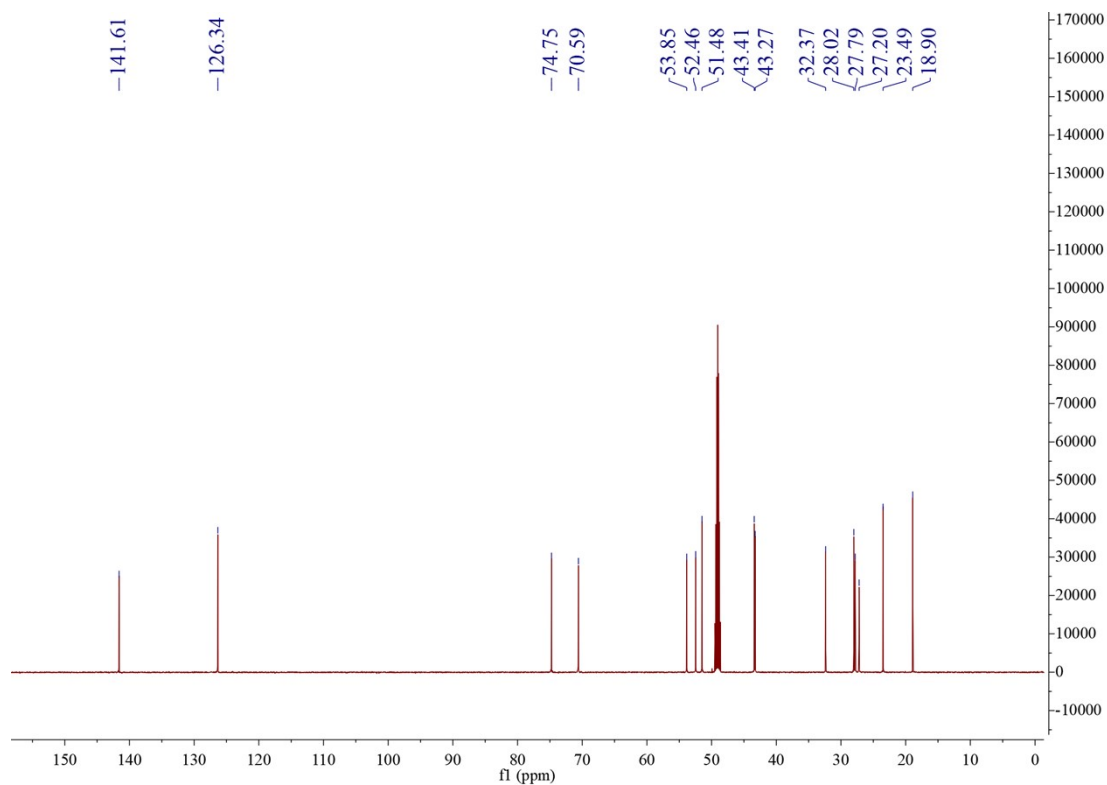

Figure S3-2. The  $^{13}\text{C}$  NMR spectrum of **2**

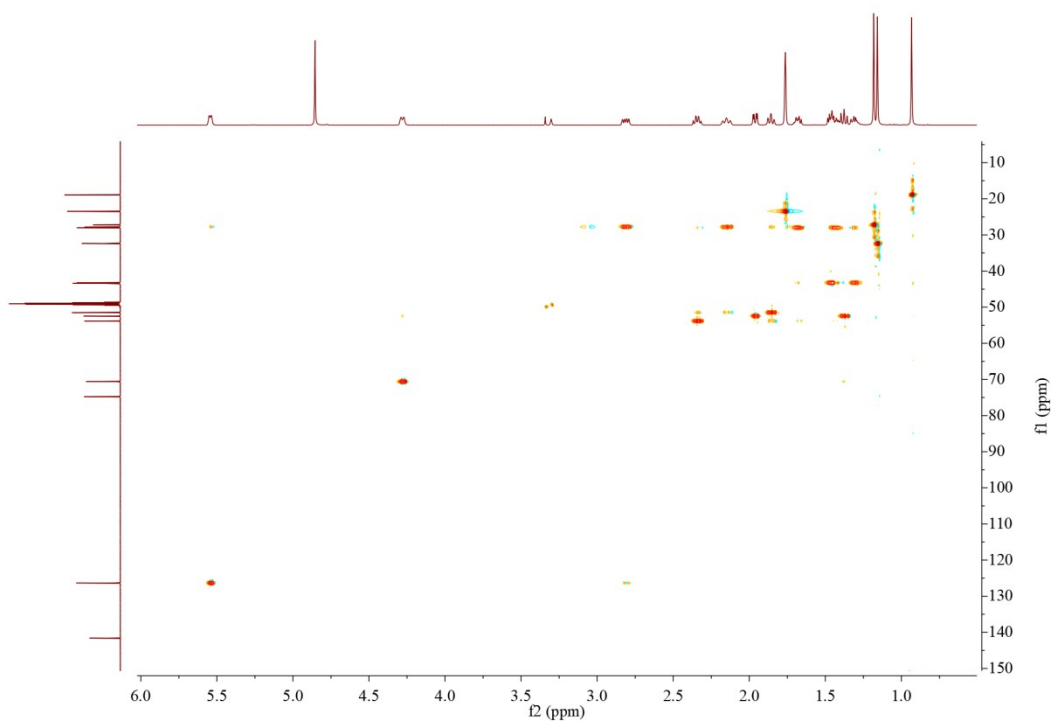

Figure S3-3. The HSQC spectrum of **2**

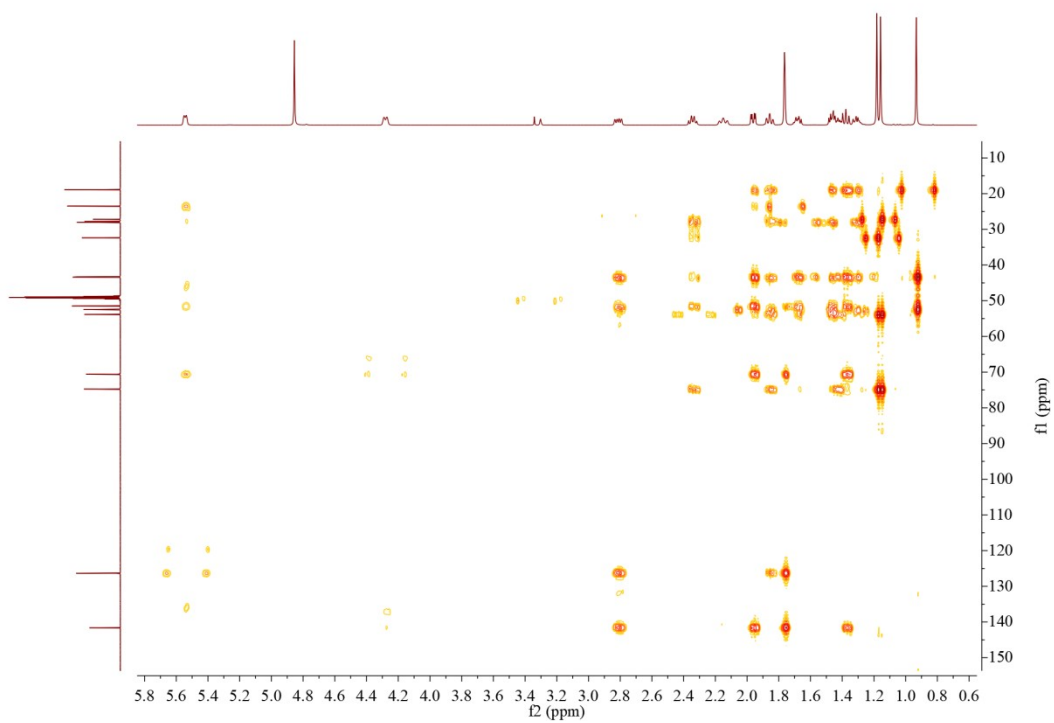

Figure S3-4. The HMBC spectrum of **2**

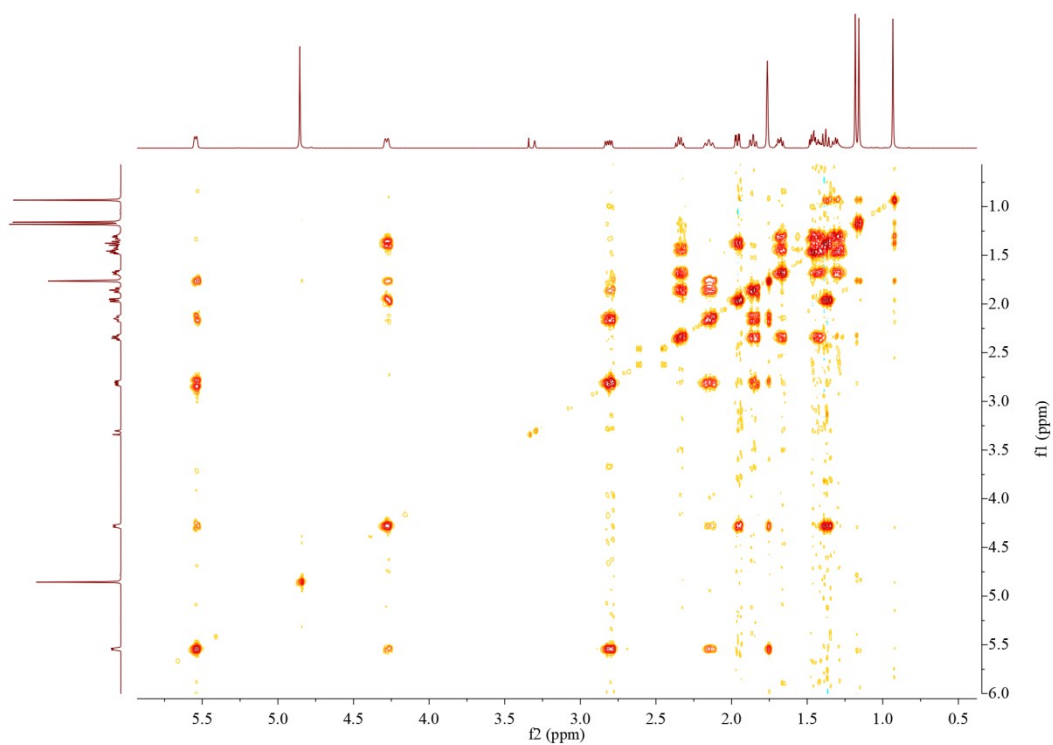

Figure S3-5. The  $^1\text{H}$ - $^1\text{H}$  COSY spectrum of **2**

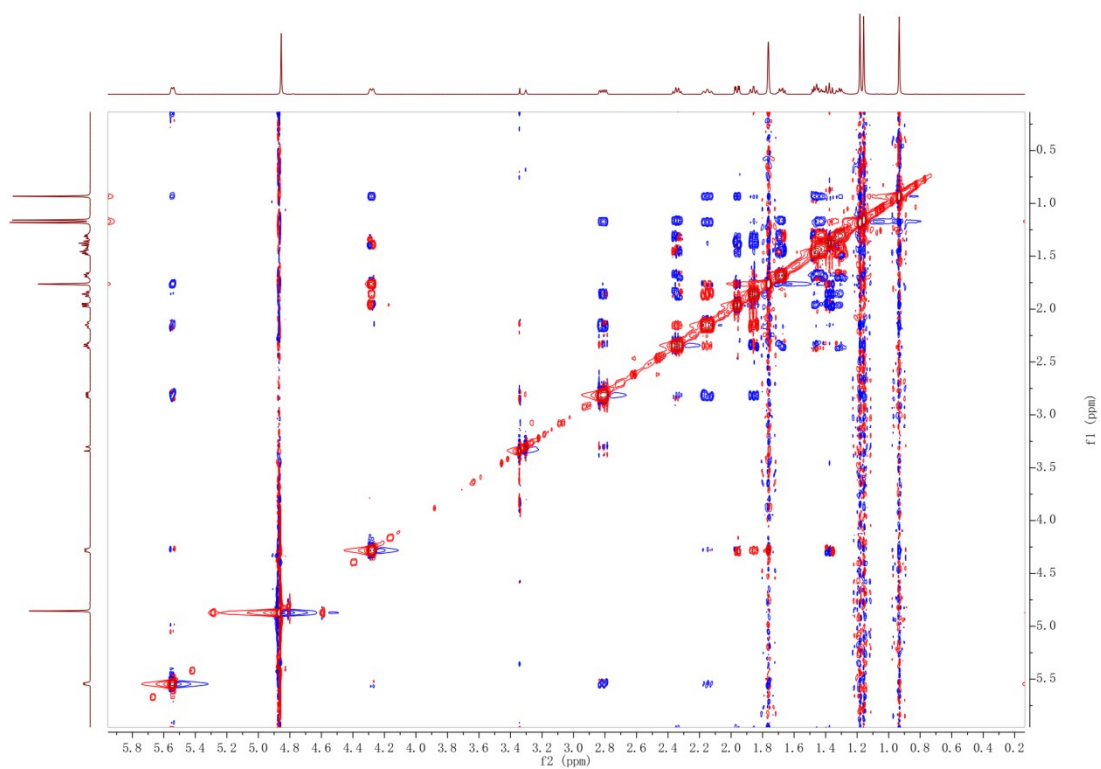

Figure S3-6. The ROESY spectrum of **2**

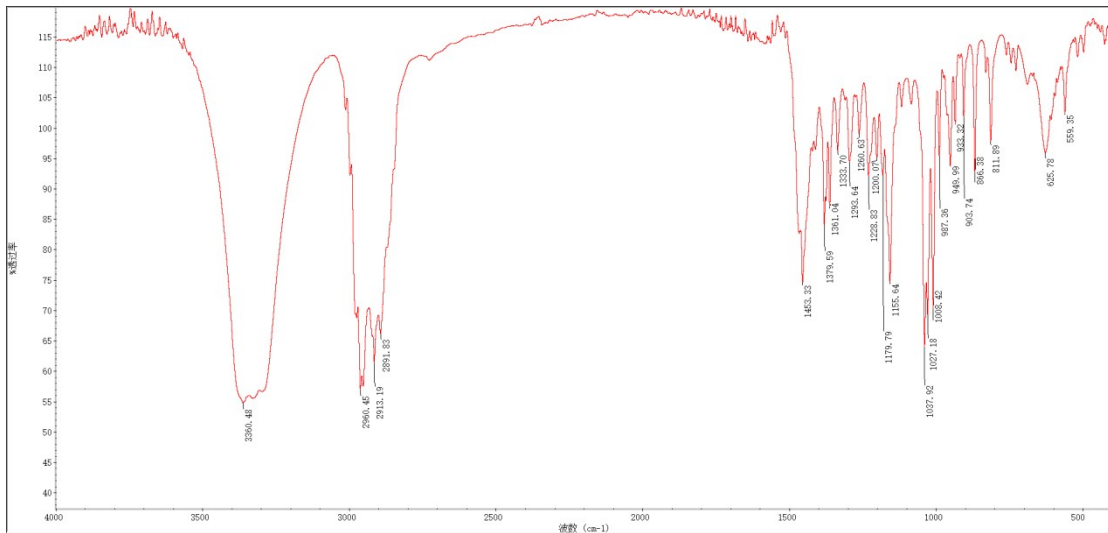

Figure S3-7. The IR spectrum of **2**

20191231\_21 #11 RT: 0.10 AV: 1 NL: 2.74E8  
 T: FTMS + p ESI Full ms [80.0000-1000.0000]

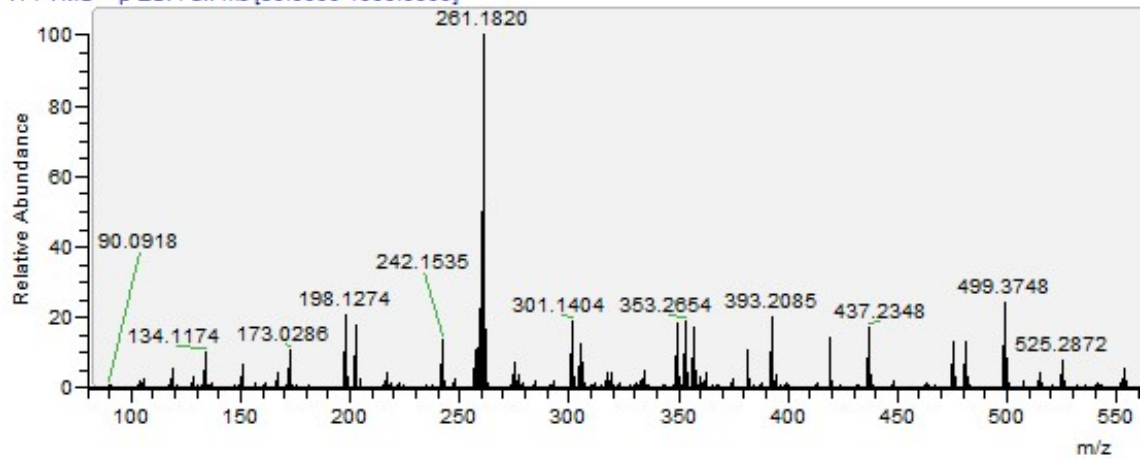

$C_{15}H_{26}O_2Na^+$  Calculated 261.1825 Found 261.1820

Figure S3-8. The HRESIMS spectrum of **2**

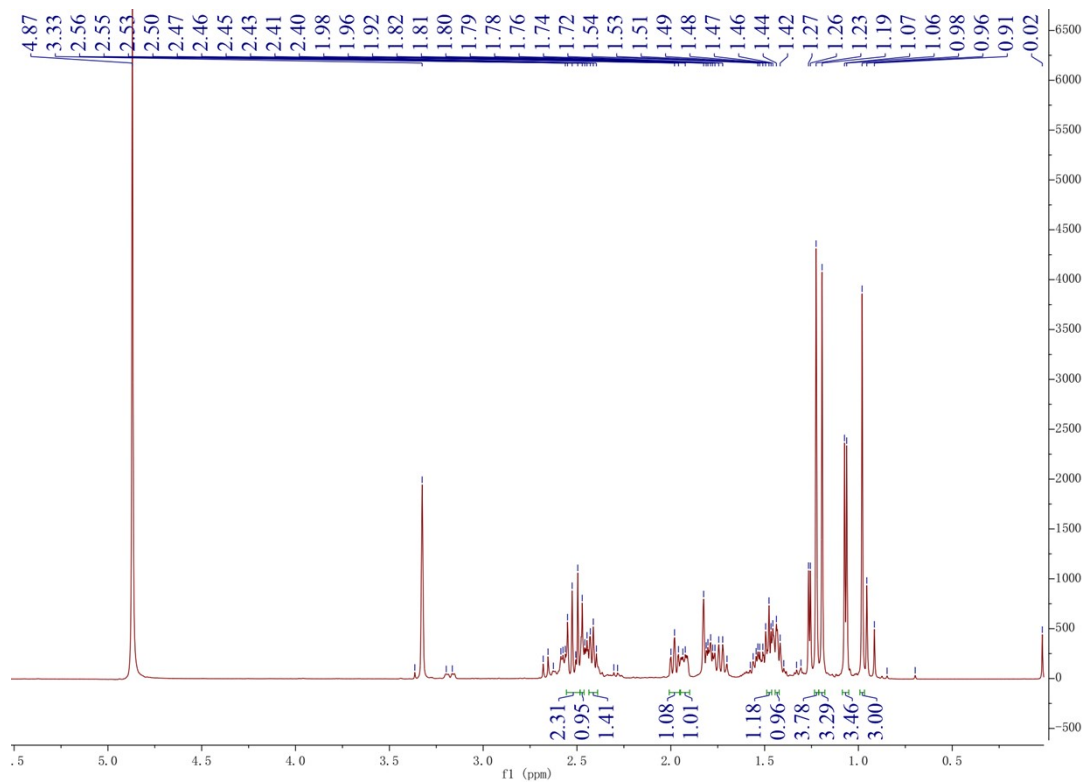

Figure S4-1. The  $^1\text{H}$  NMR spectrum of **3**

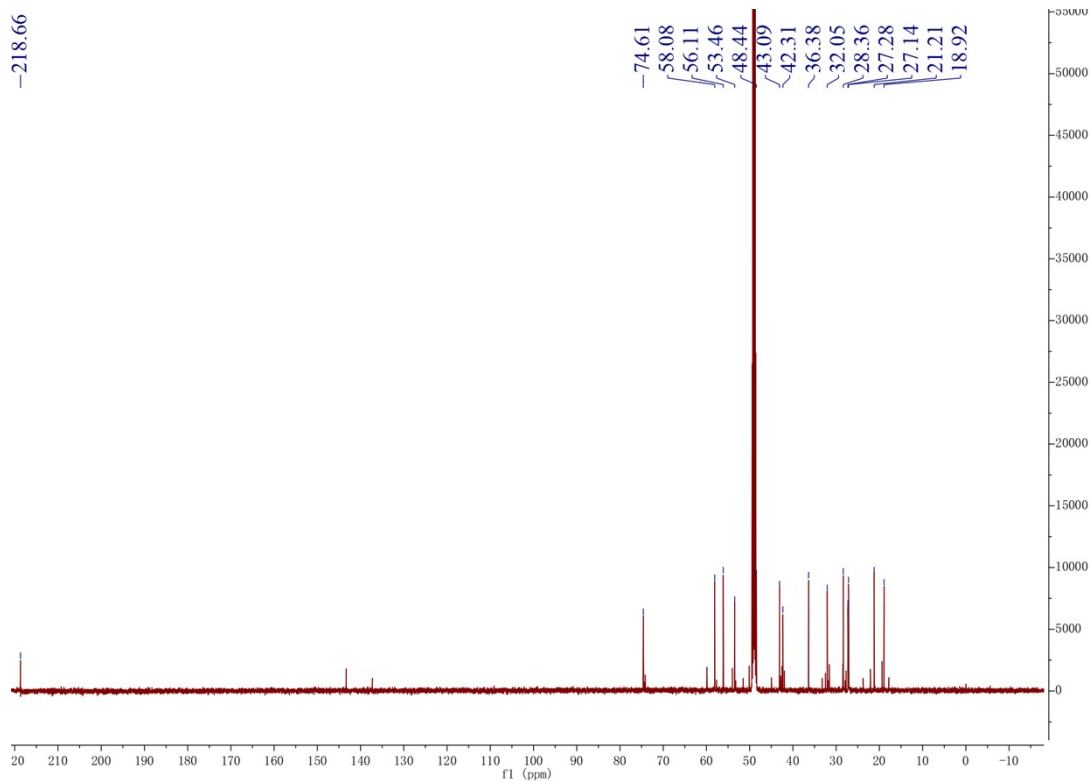

Figure S4-2. The  $^{13}\text{C}$  NMR spectrum of **3**

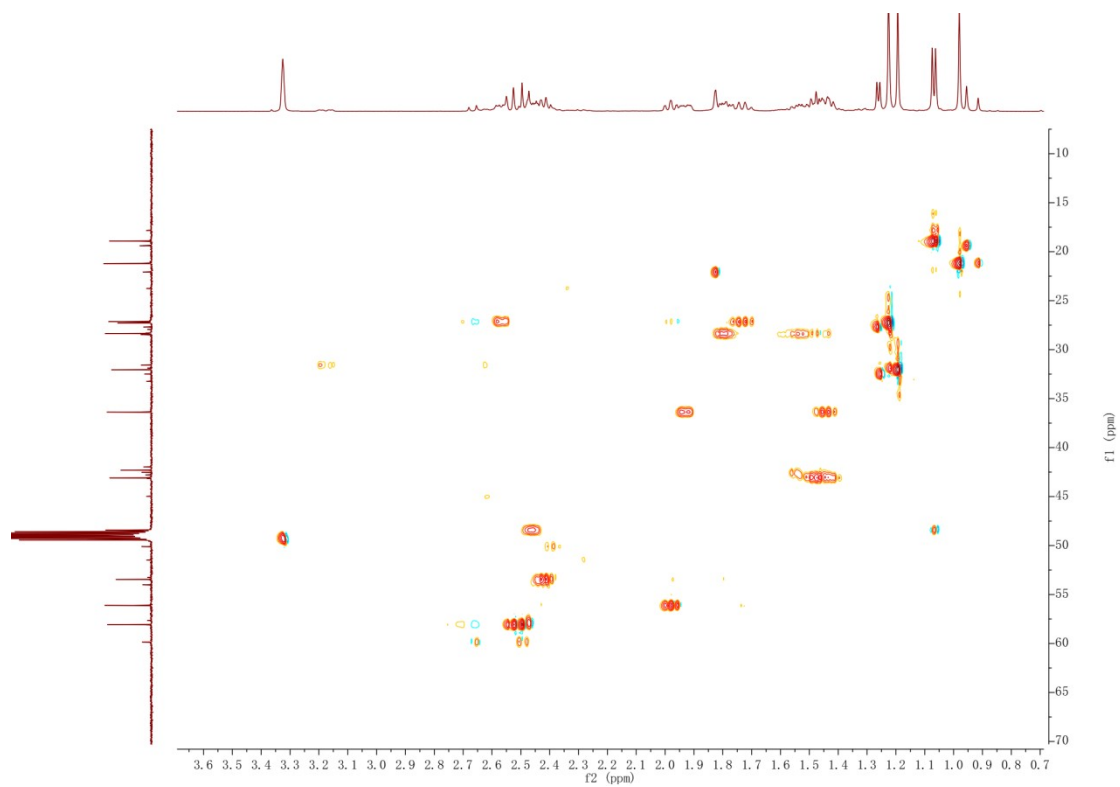

Figure S4-3. The HSQC spectrum of **3**

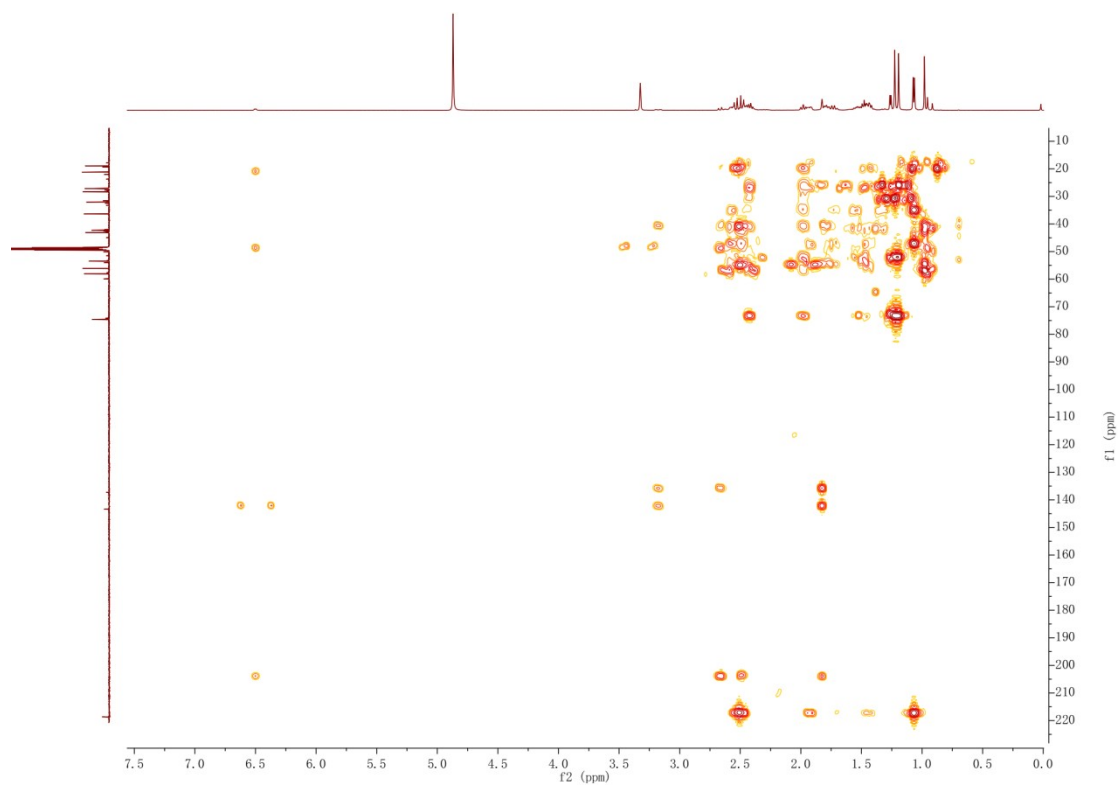

Figure S4-4. The HMBC spectrum of **3**

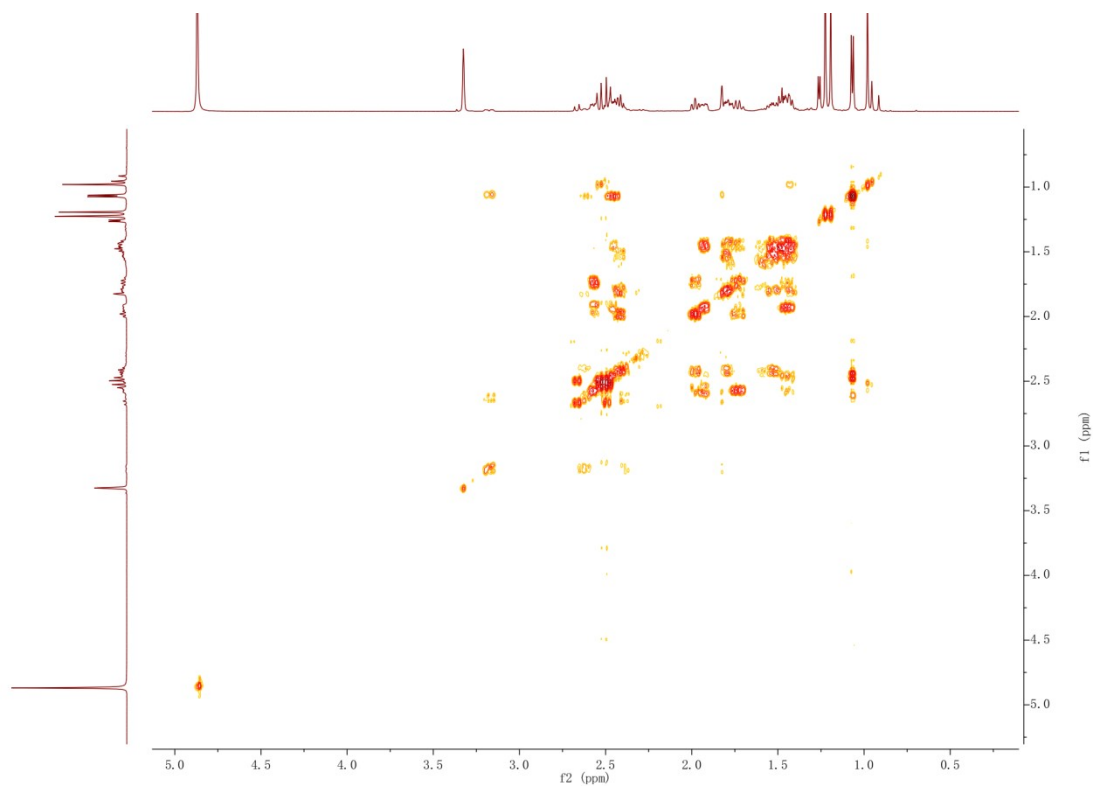

Figure S4-5. The  $^1\text{H}$ - $^1\text{H}$  COSY spectrum of **3**

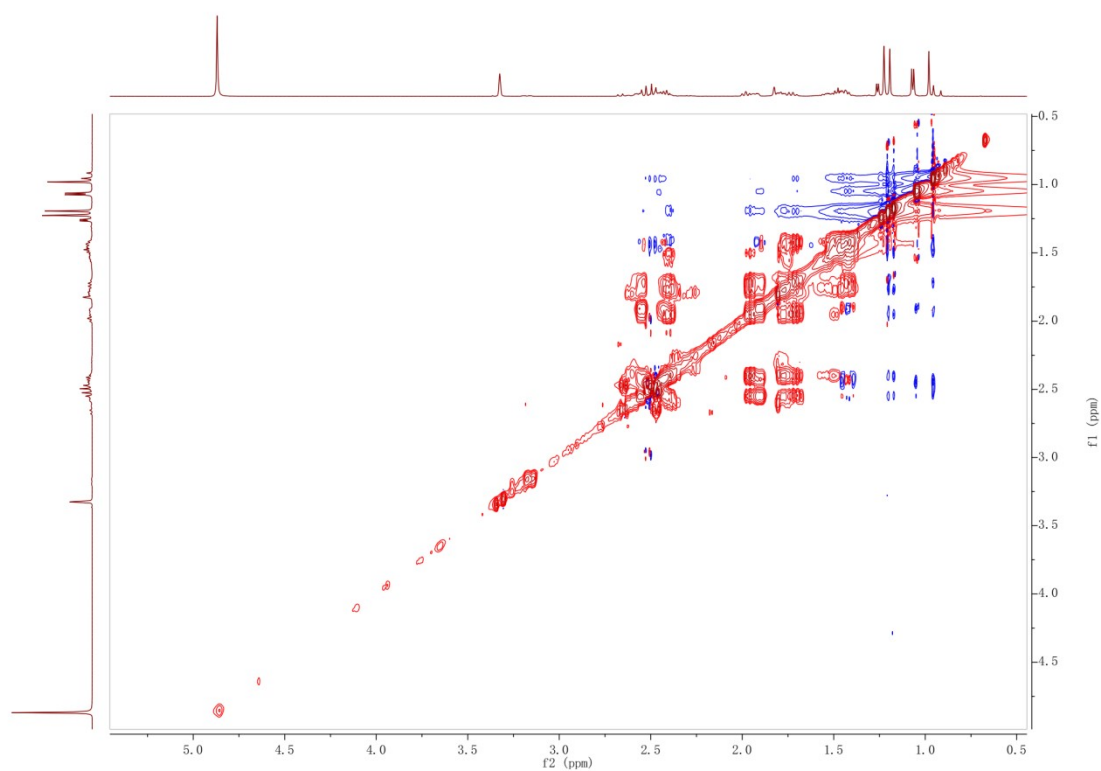

Figure S4-6. The ROESY spectrum of **3**

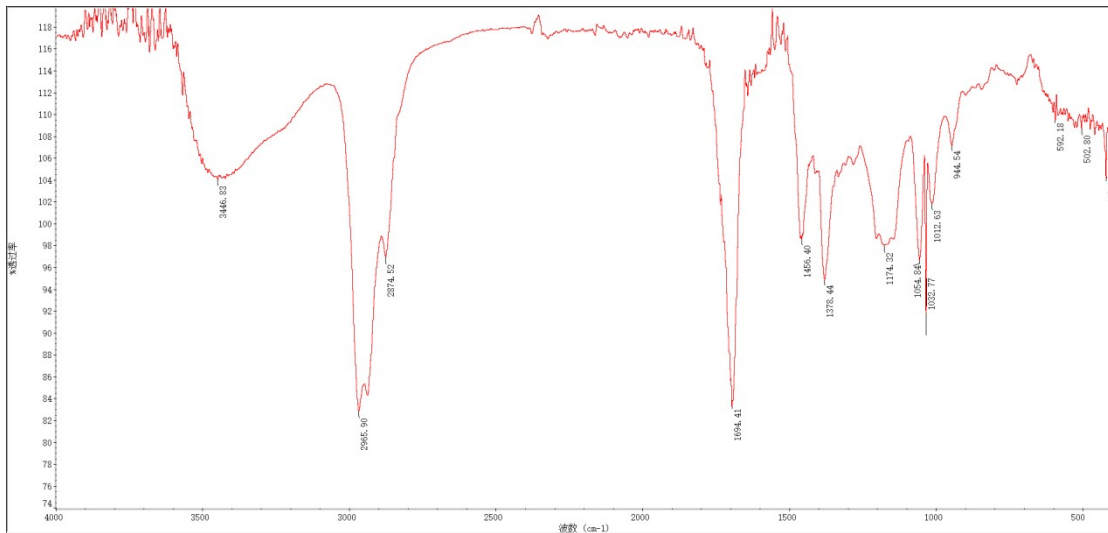

Figure S4-7. The IR spectrum of **3**

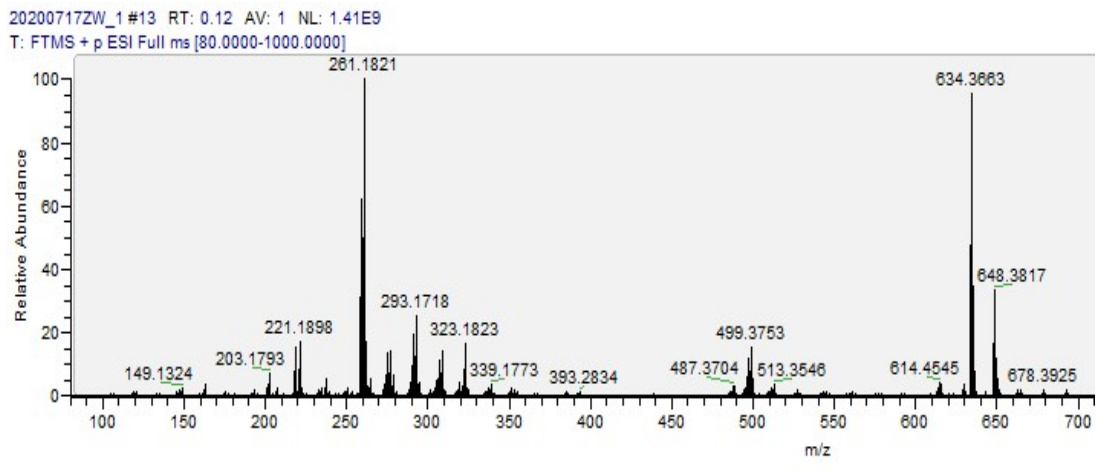

$C_{15}H_{26}O_2Na^+$  Calculated 261.1825 Found 261.1821

Figure S4-8. The HRESIMS spectrum of **3**



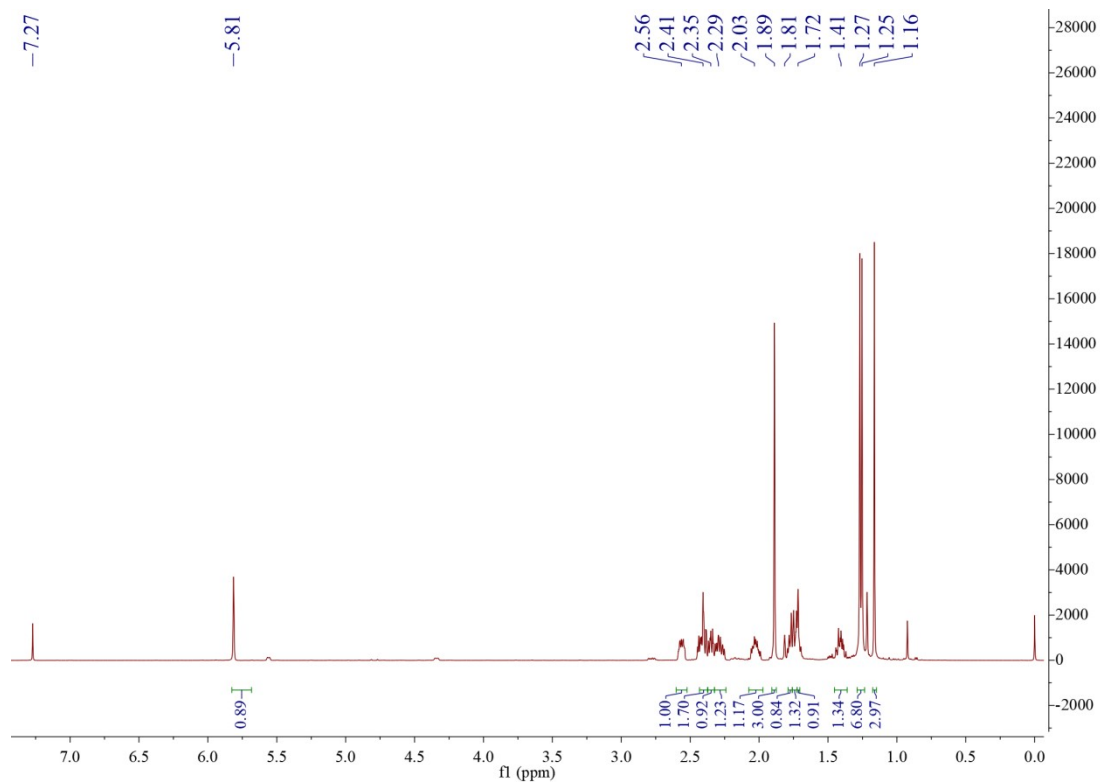

Figure S5-1. The  $^1\text{H}$  NMR spectrum of **4**

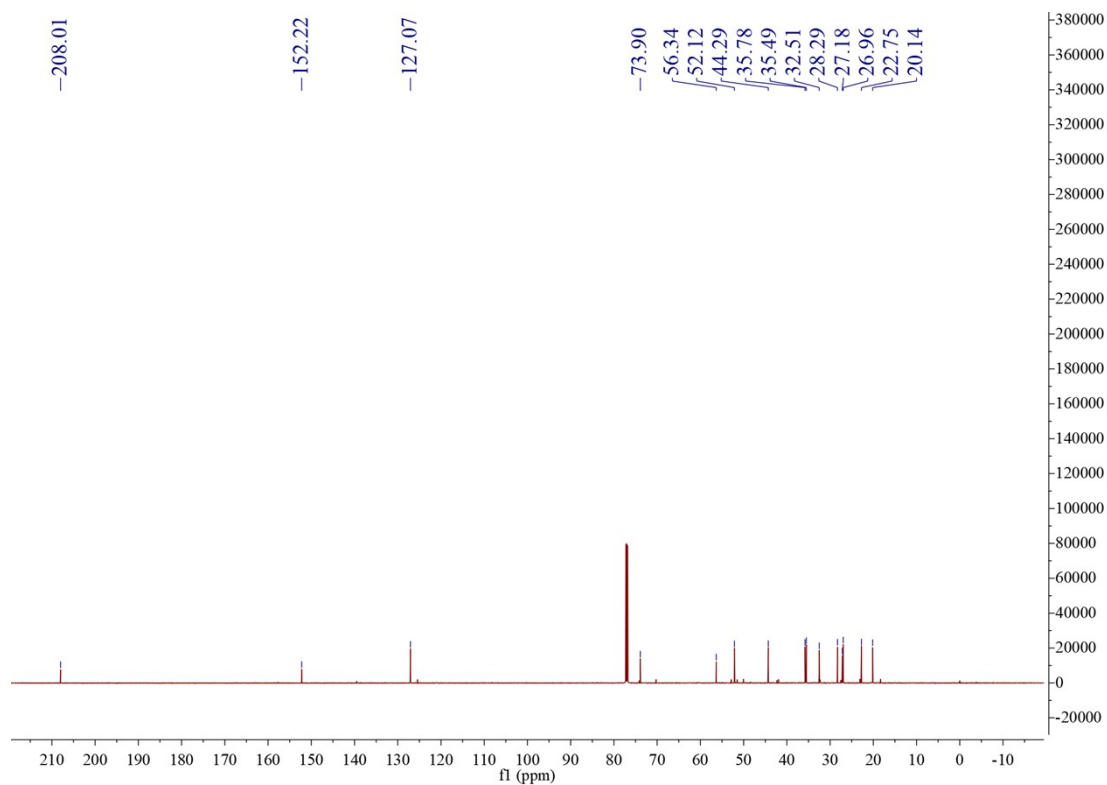

Figure S5-2. The  $^{13}\text{C}$  NMR spectrum of **4**

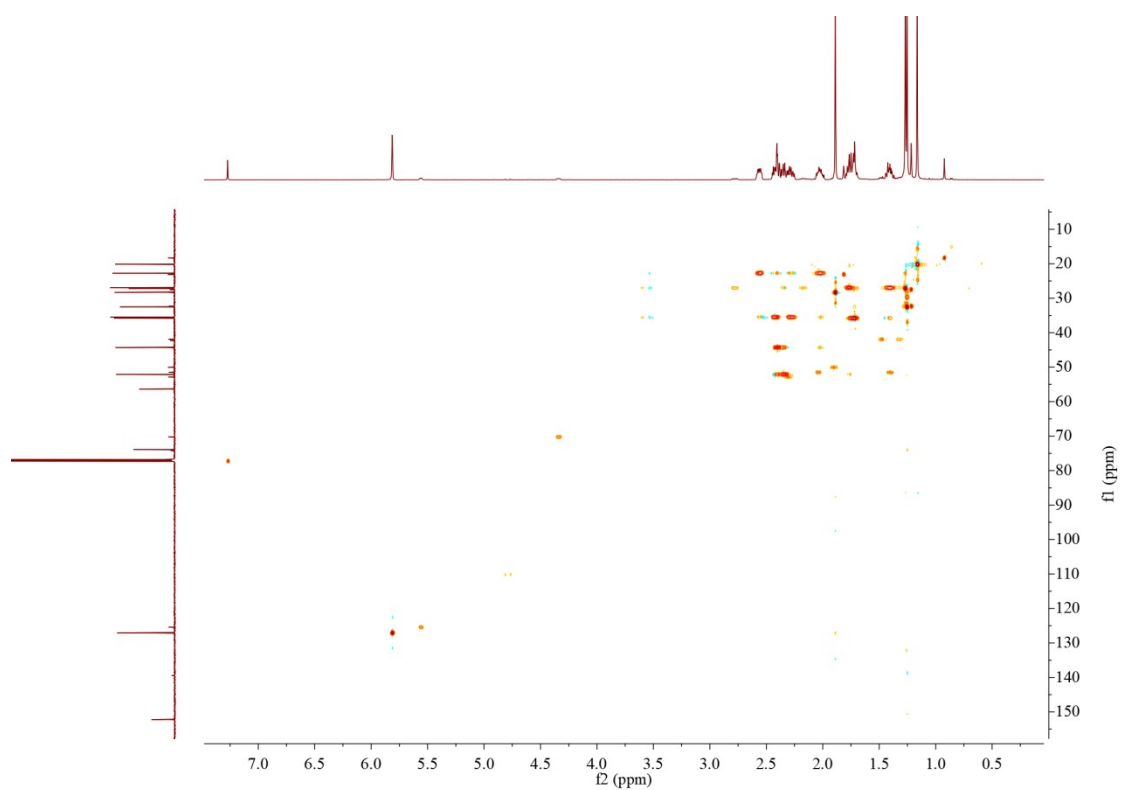

Figure S5-3. The HSQC spectrum of **4**

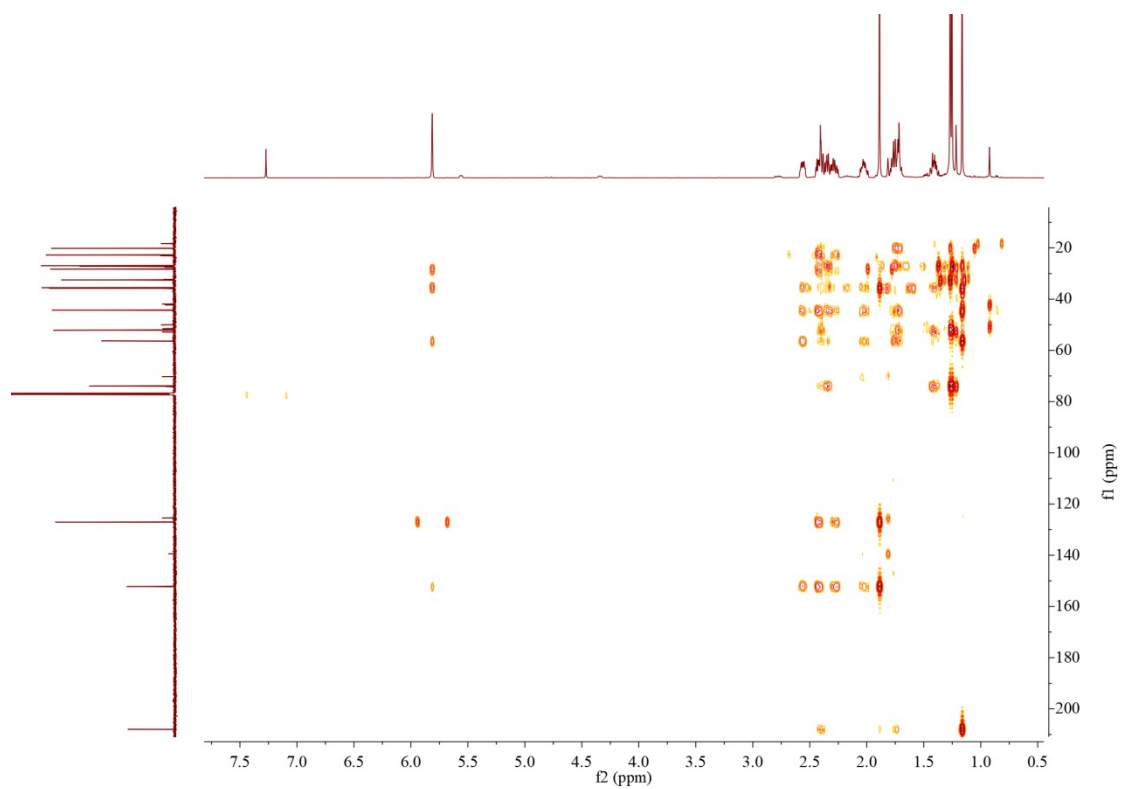

Figure S5-4. The HMBC spectrum of **4**

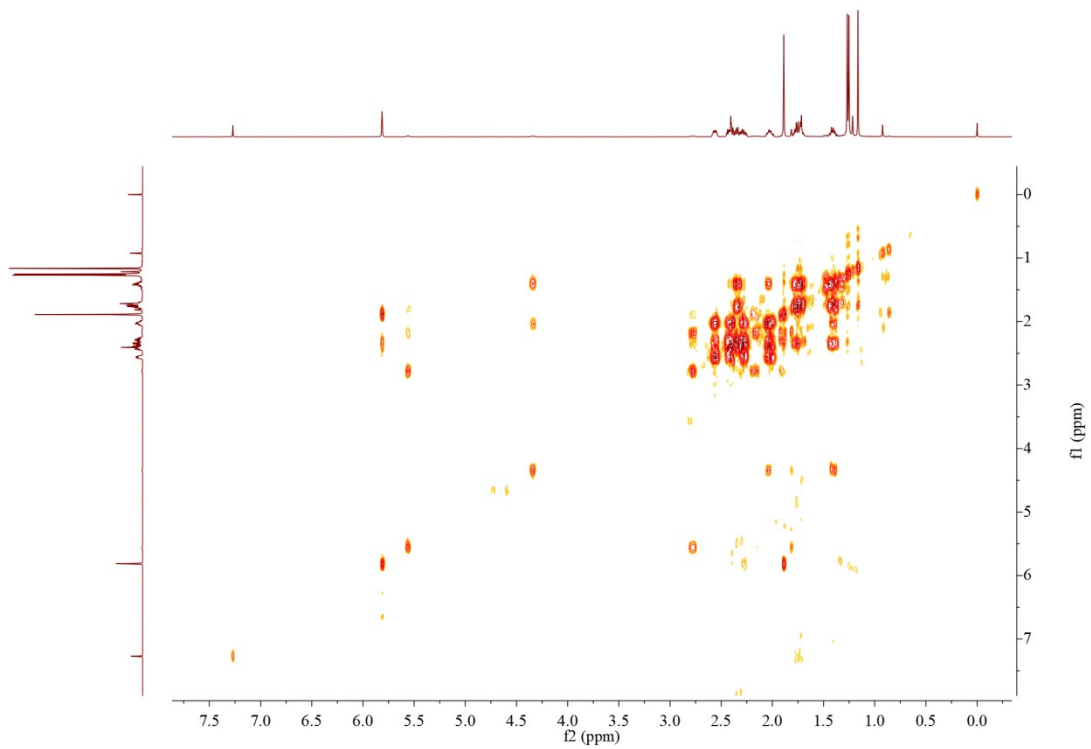

Figure S5-5. The  $^1\text{H}$ - $^1\text{H}$  COSY spectrum of **4**

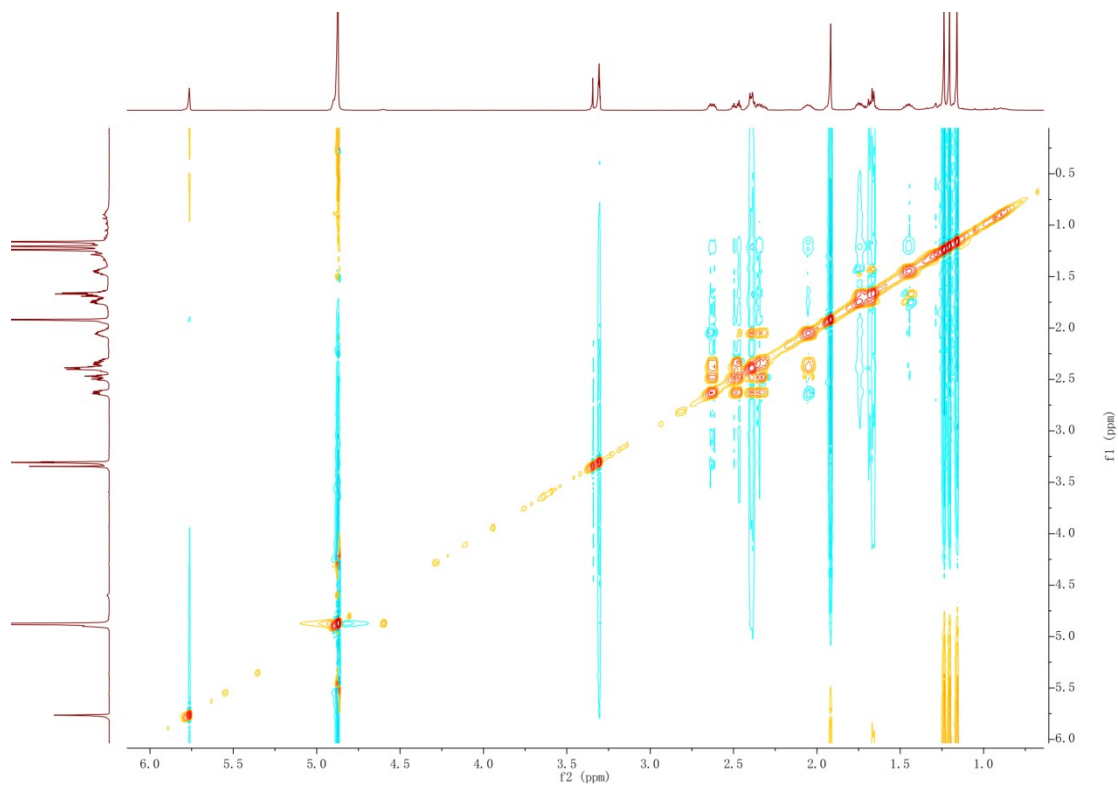

Figure S5-6. The ROESY spectrum of **4**

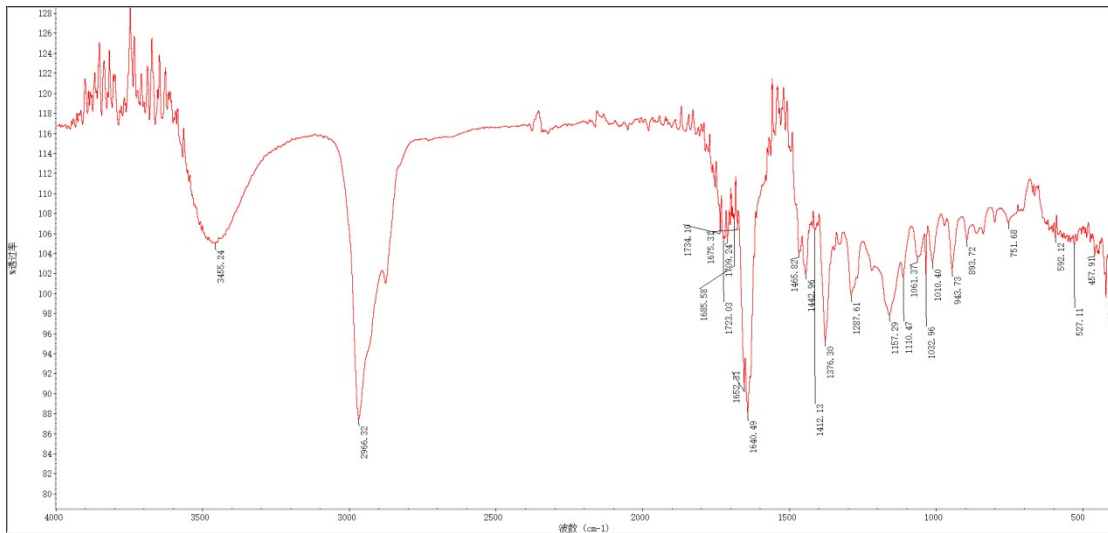

Figure S5-7. The IR spectrum of **4**

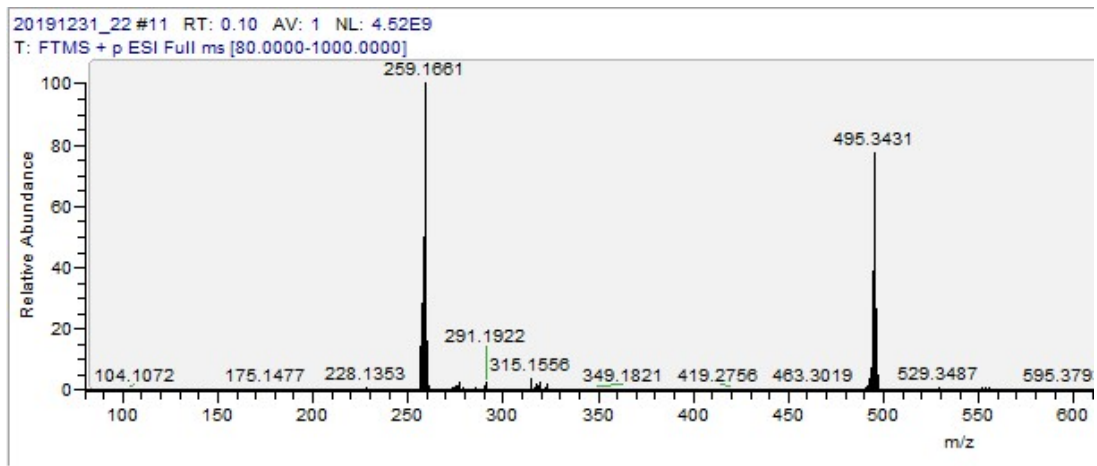

$C_{15}H_{24}O_2Na^+$  Calculated 259.1669 Found 259.1661

Figure S5-8. The HRESIMS spectrum of **4**

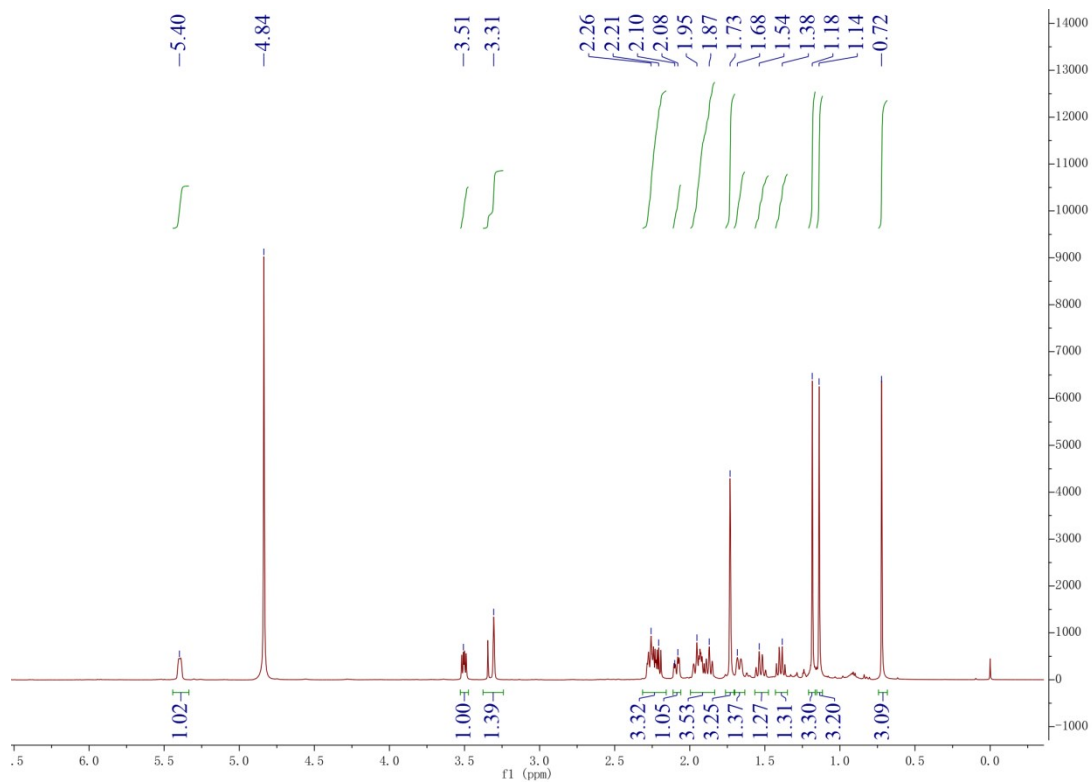

Figure S6-1. The  $^1\text{H}$  NMR spectrum of **5**

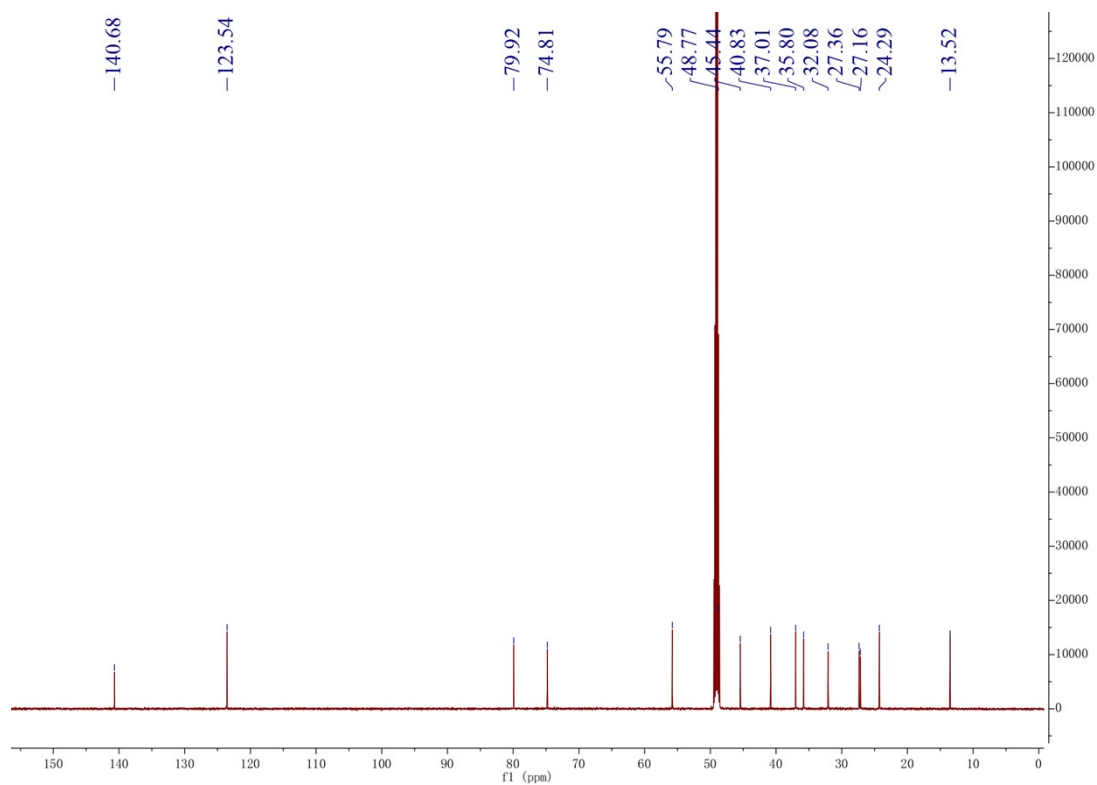

Figure S6-2. The  $^{13}\text{C}$  NMR spectrum of **5**

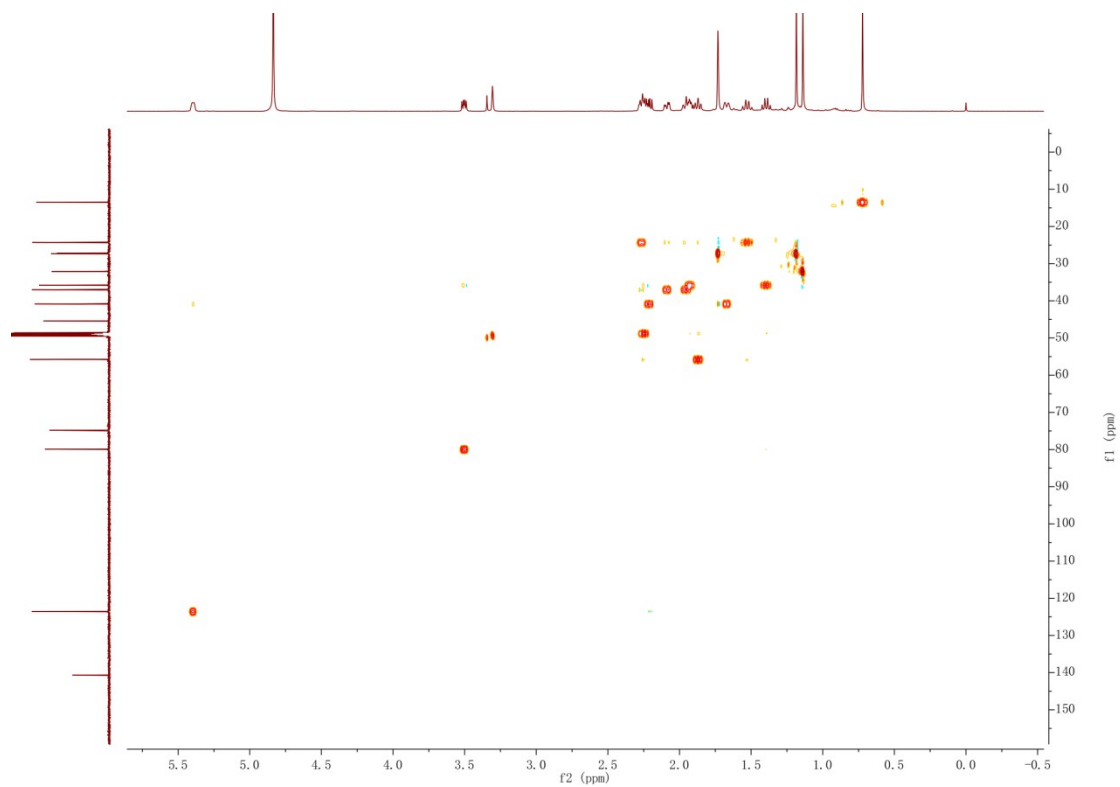

Figure S6-3. The HSQC spectrum of **5**

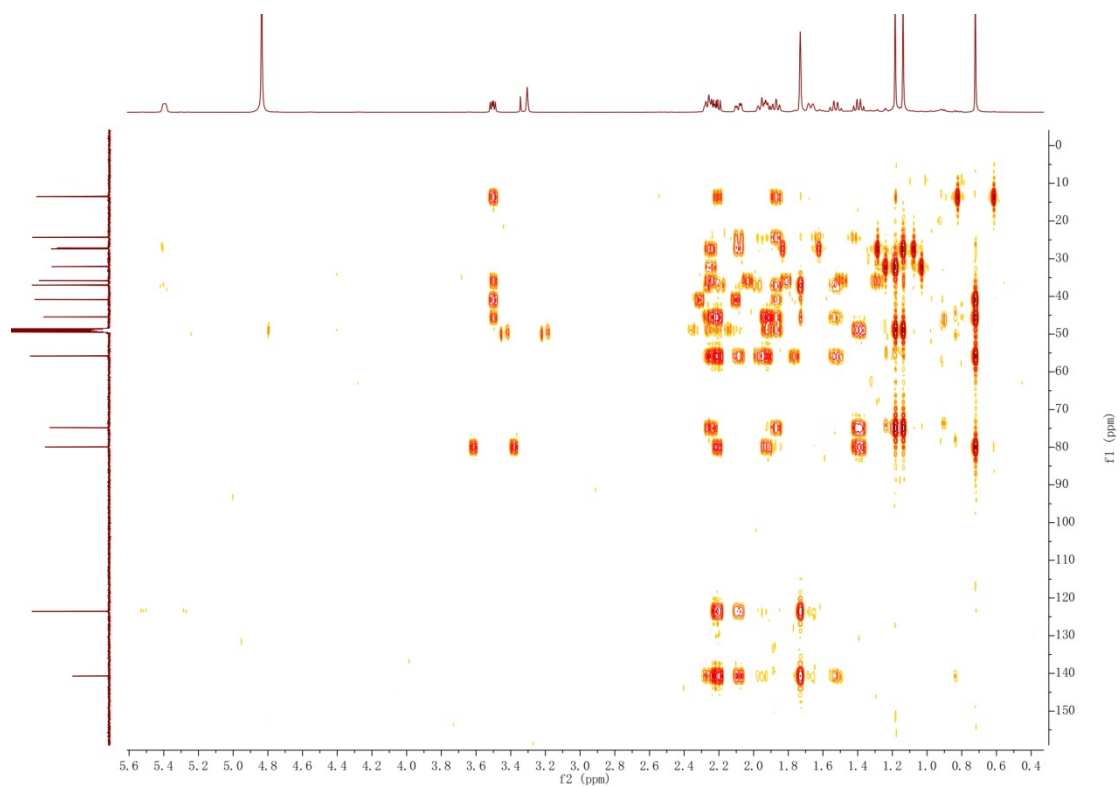

Figure S6-4. The HMBC spectrum of **5**

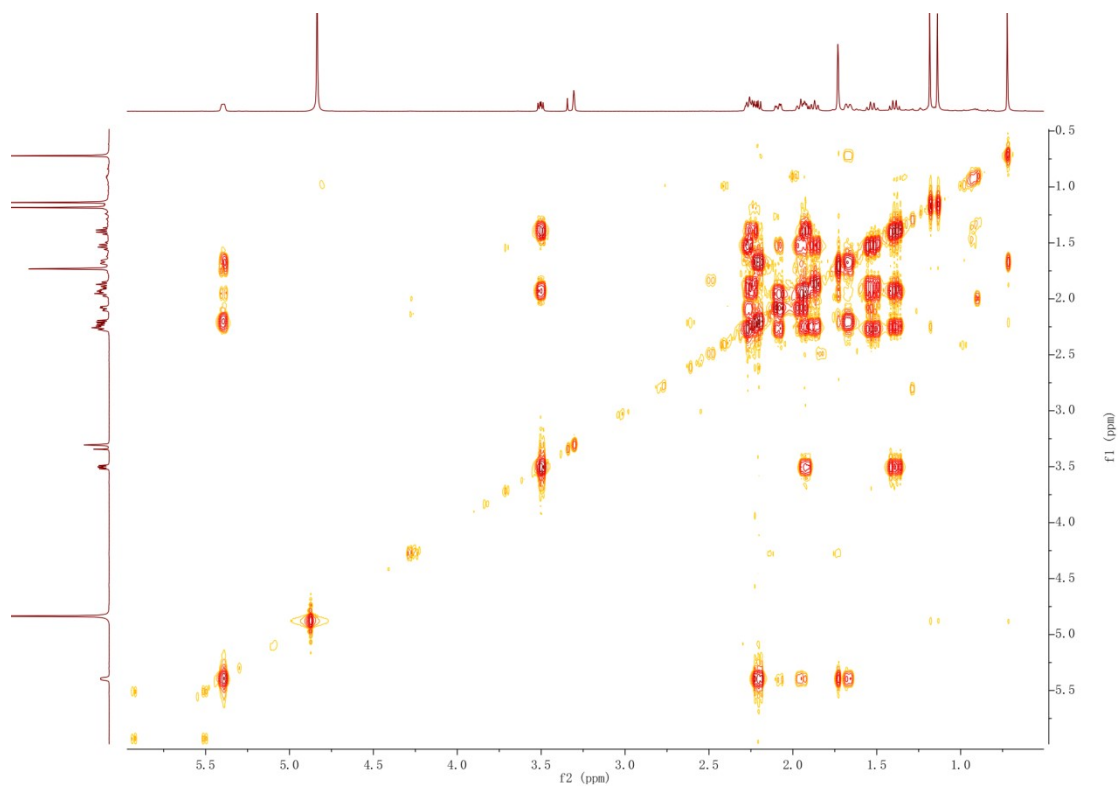

Figure S6-5. The  $^1\text{H}$ - $^1\text{H}$  COSY spectrum of **5**

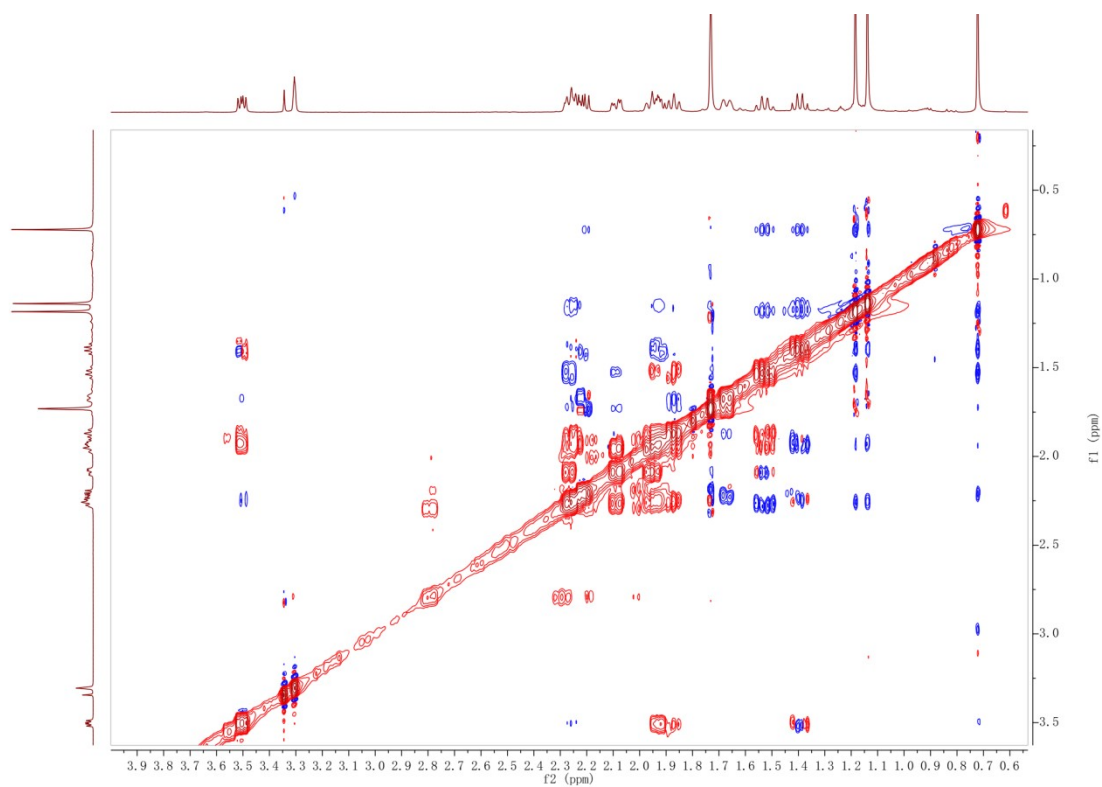

Figure S6-6. The ROESY spectrum of **5**

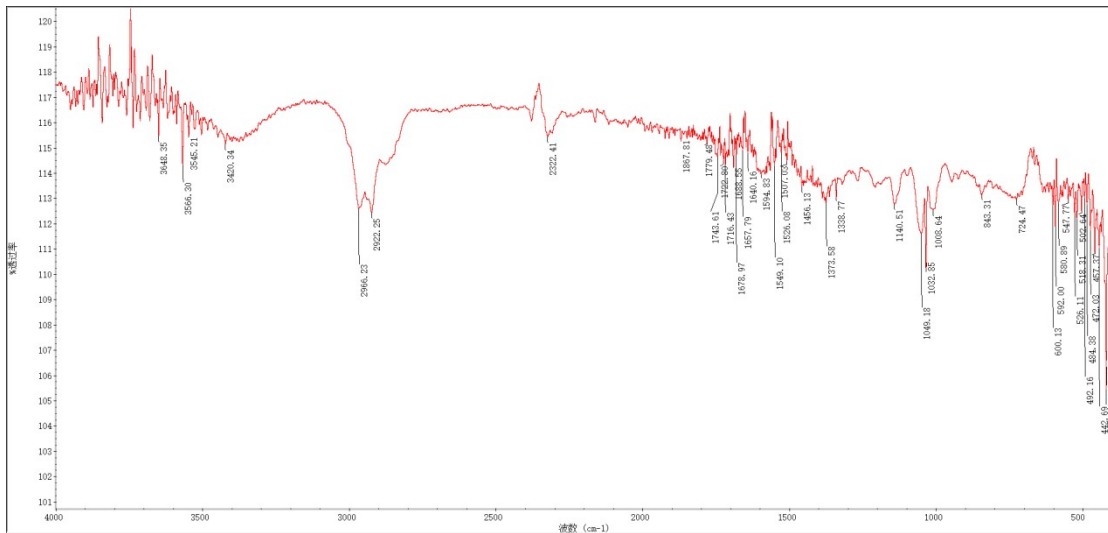

Figure S6-7. The IR spectrum of **5**

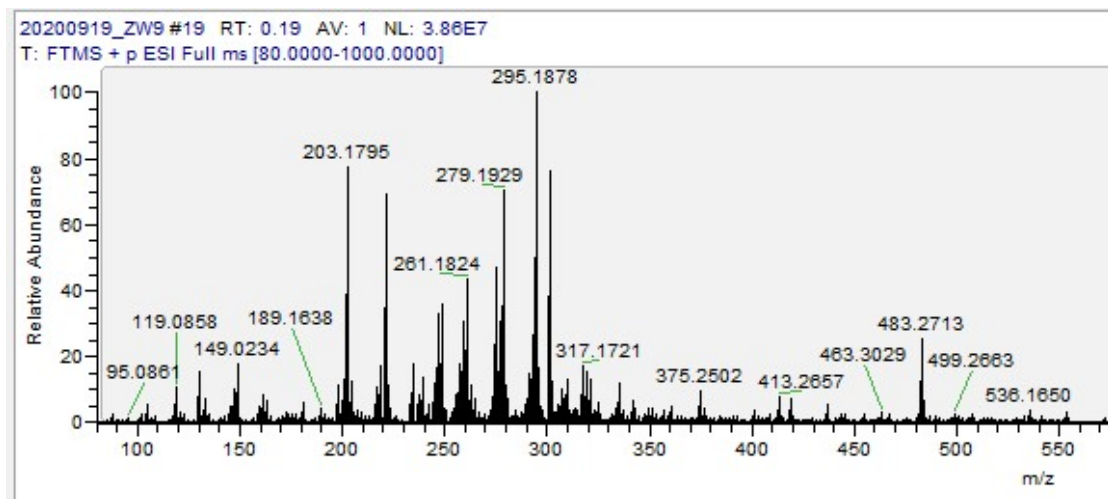

$C_{15}H_{26}O_2Na^+$  Calculated 261.1825 Found 261.1824

Figure S6-8. The HRESIMS spectrum of **5**



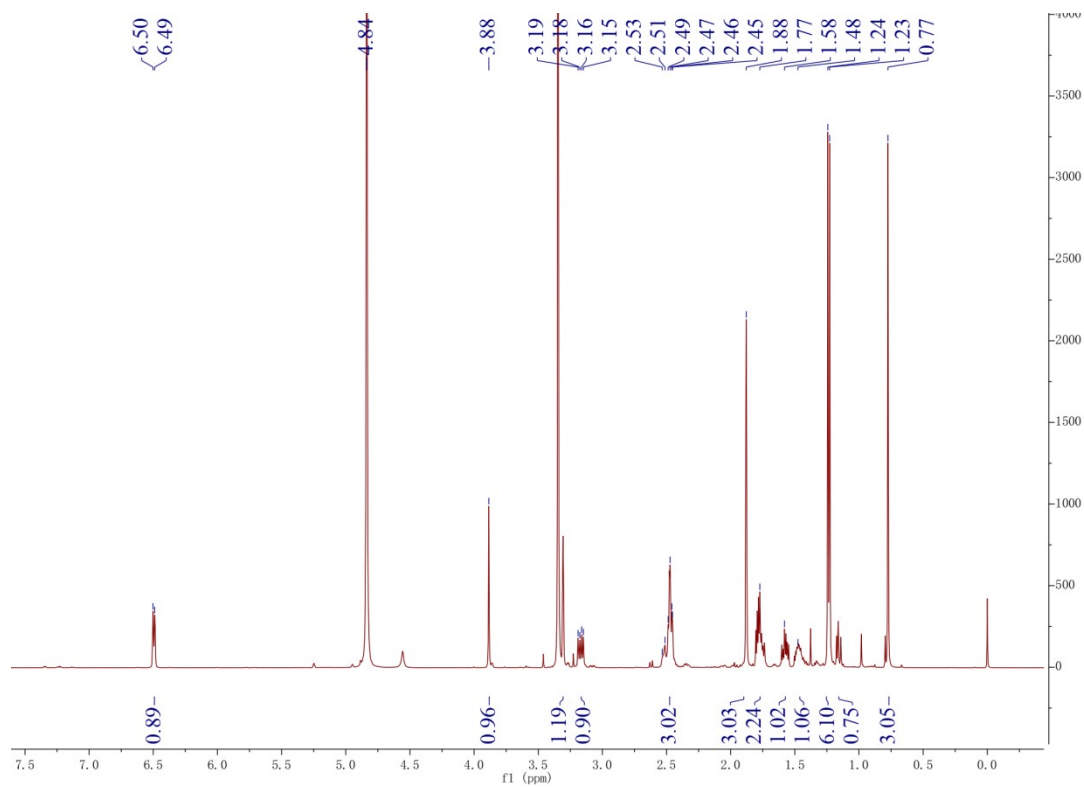

Figure S7-1. The  $^1\text{H}$  NMR spectrum of **6**

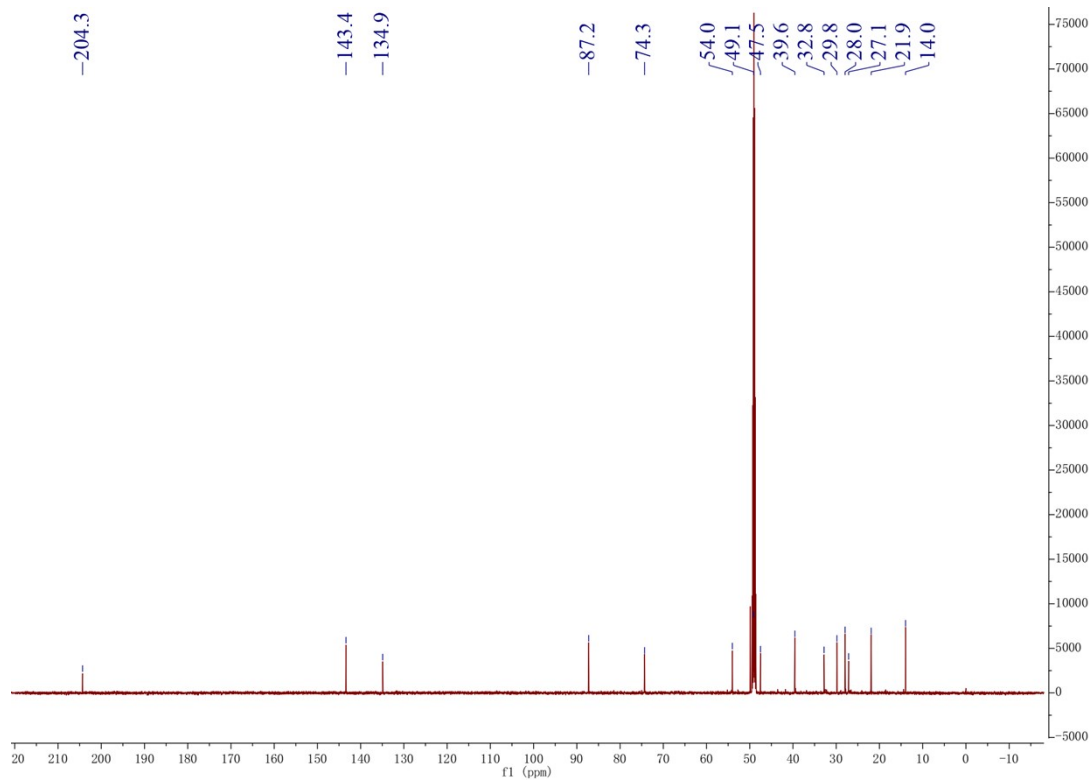

Figure S7-2. The  $^{13}\text{C}$  NMR spectrum of **6**

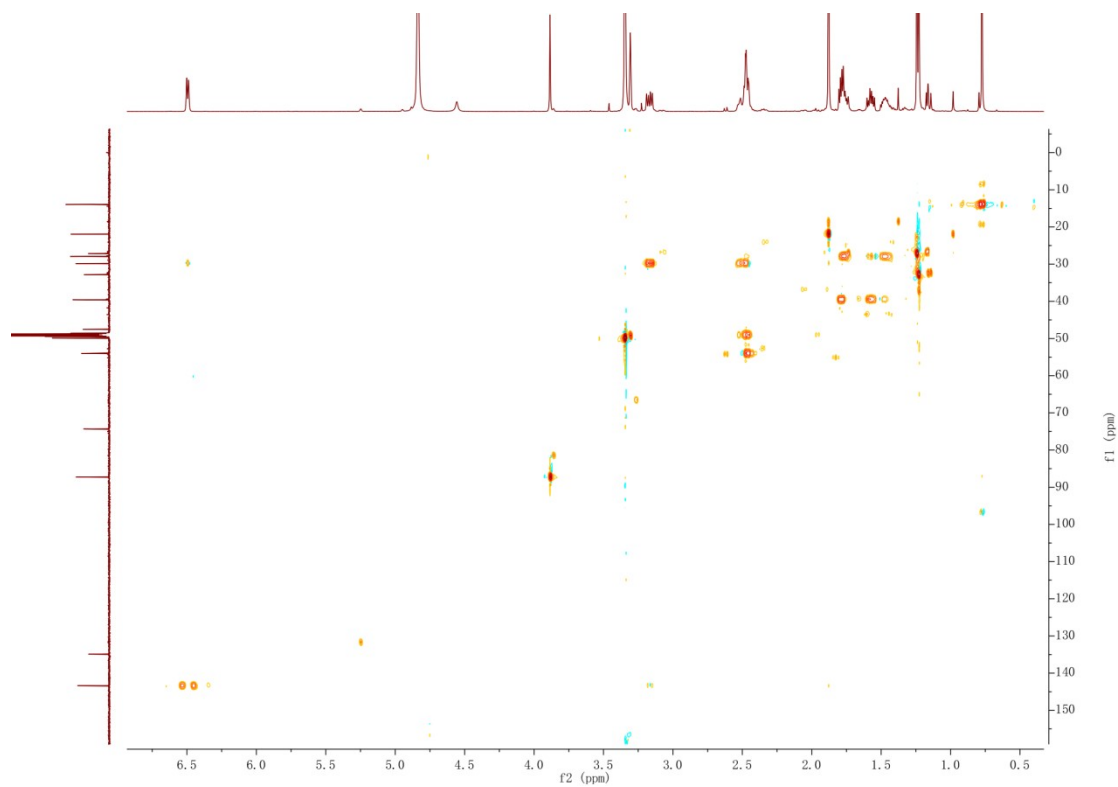

Figure S7-3. The HSQC spectrum of **6**

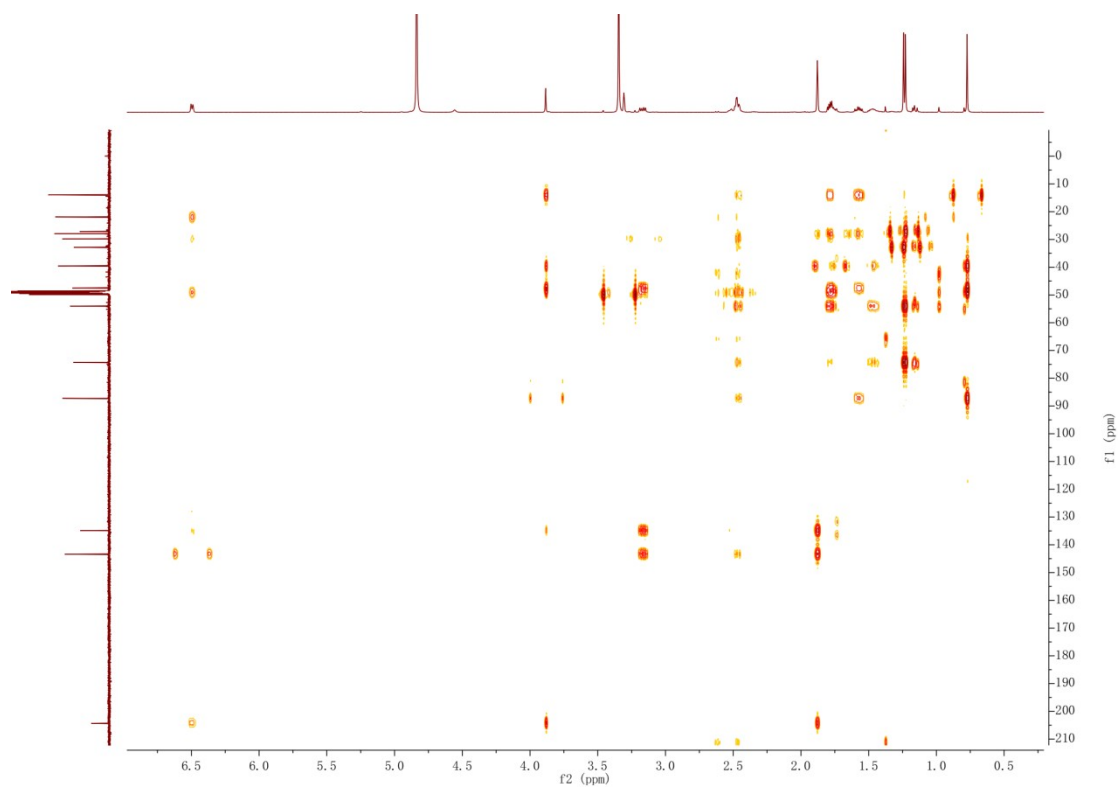

Figure S7-4. The HMBC spectrum of **6**

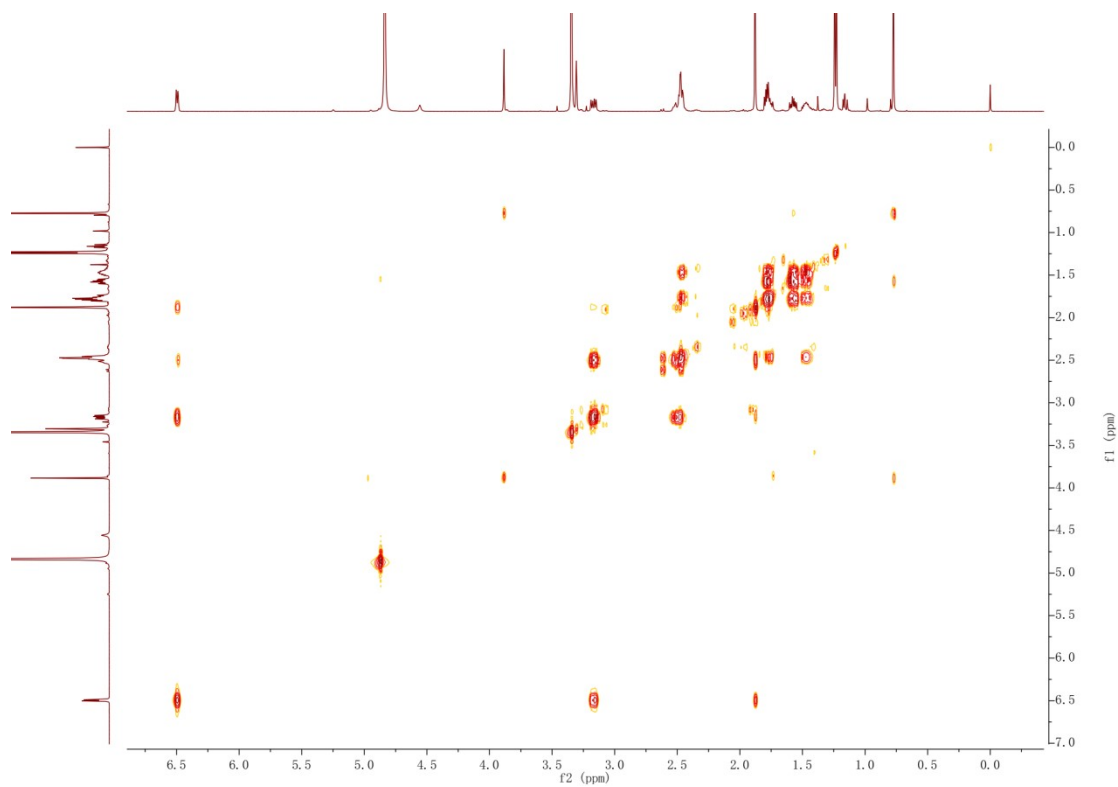

Figure S7-5. The  $^1\text{H}$ - $^1\text{H}$  COSY spectrum of **6**

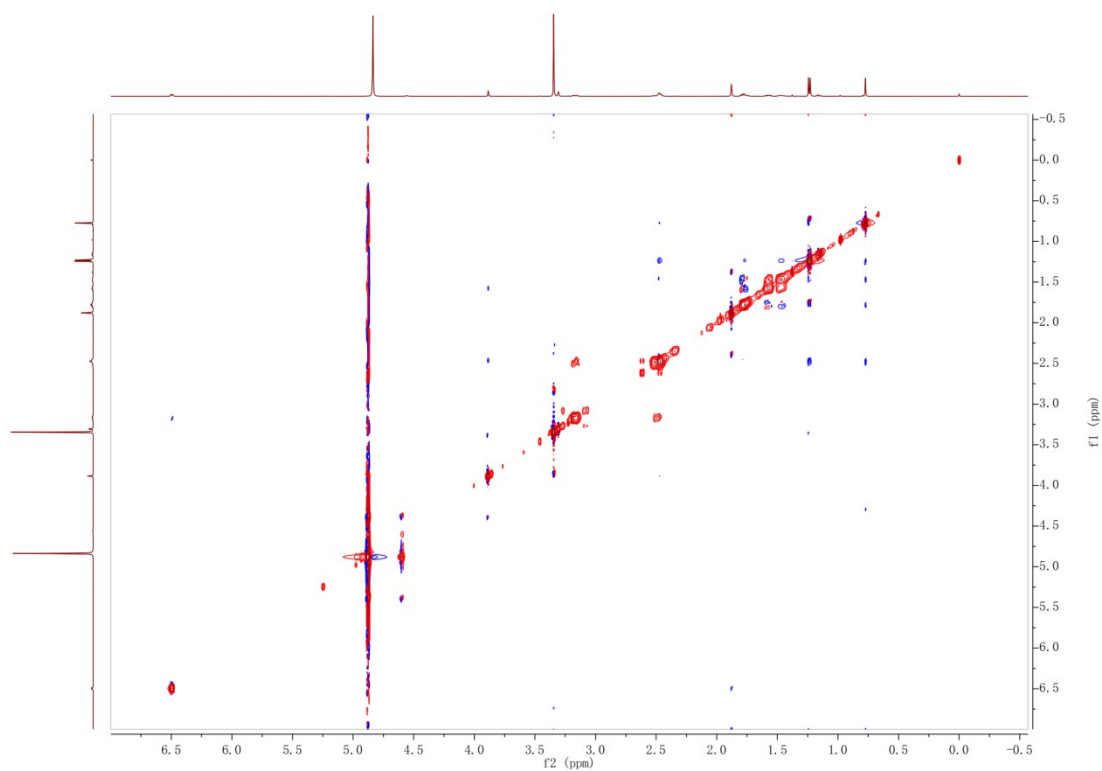

Figure S7-6. The ROESY spectrum of **6**

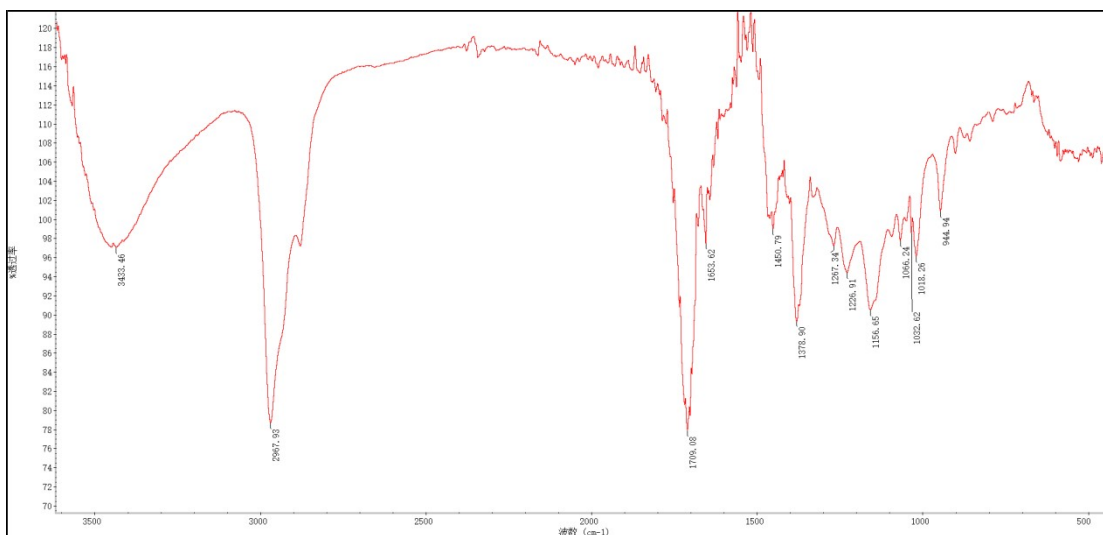

Figure S7-7. The IR spectrum of **6**

20200905\_ZW\_11 #13 RT: 0.12 AV: 1 NL: 1.16E9  
 T: FTMS + p ESI Full ms [80.0000-1000.0000]

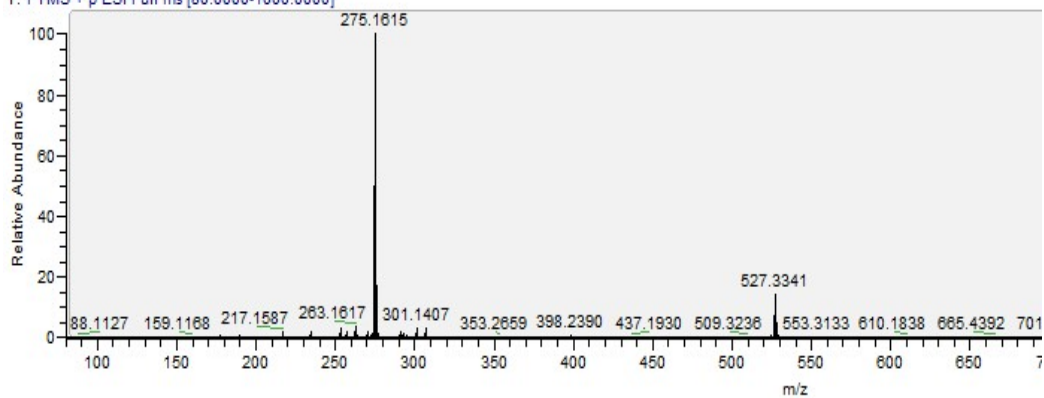

$C_{15}H_{26}O_2Na^+$  Calculated 275.1615 Found 275.1615

Figure S7-8. The HRESIMS spectrum of **6**

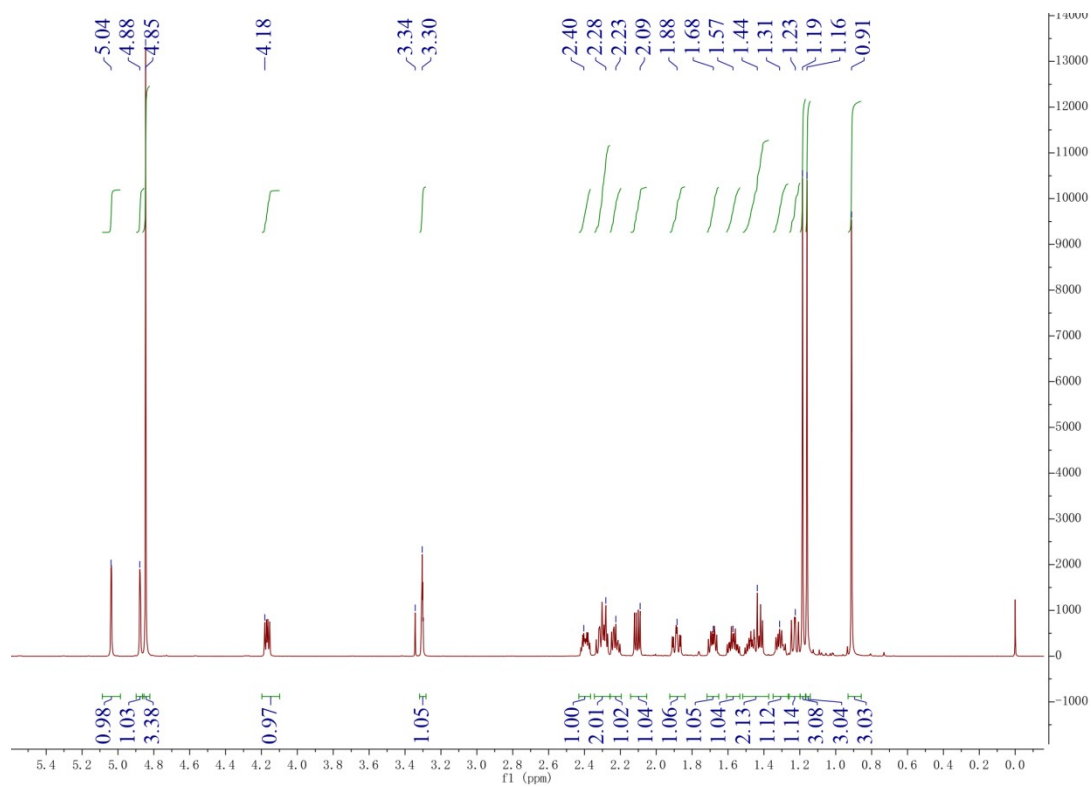

Figure S8-1. The  $^1\text{H}$  NMR spectrum of **7**

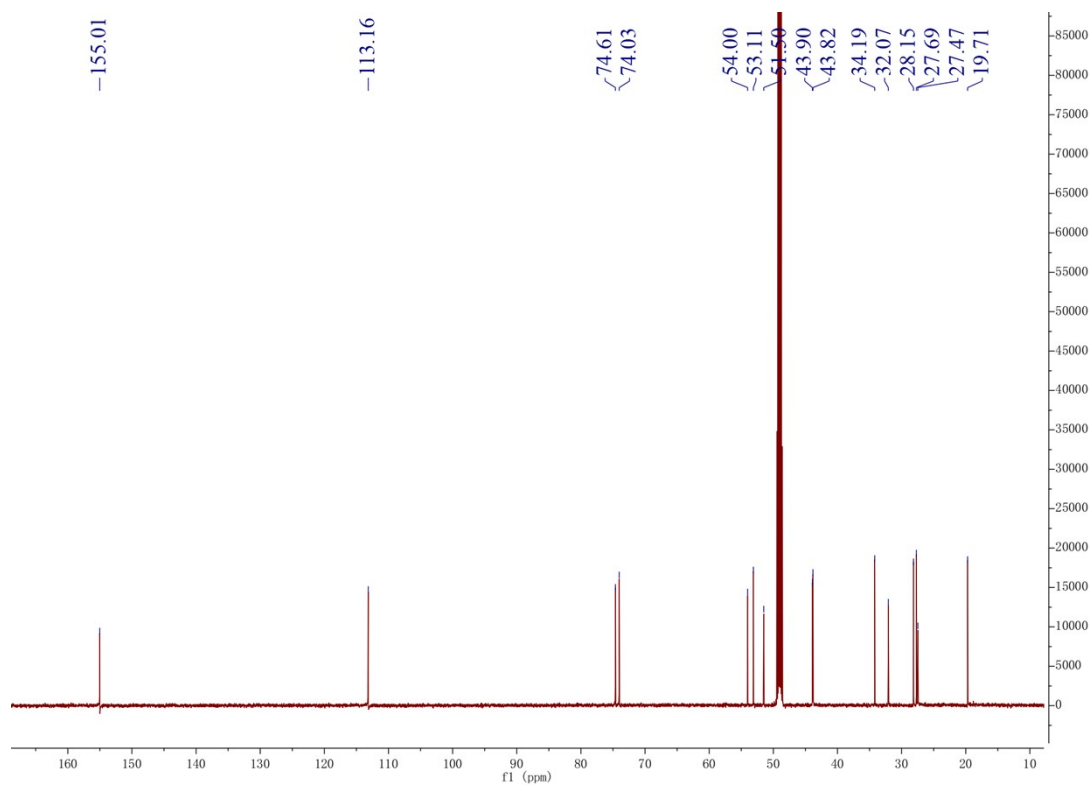

Figure S8-2. The  $^{13}\text{C}$  NMR spectrum of **7**

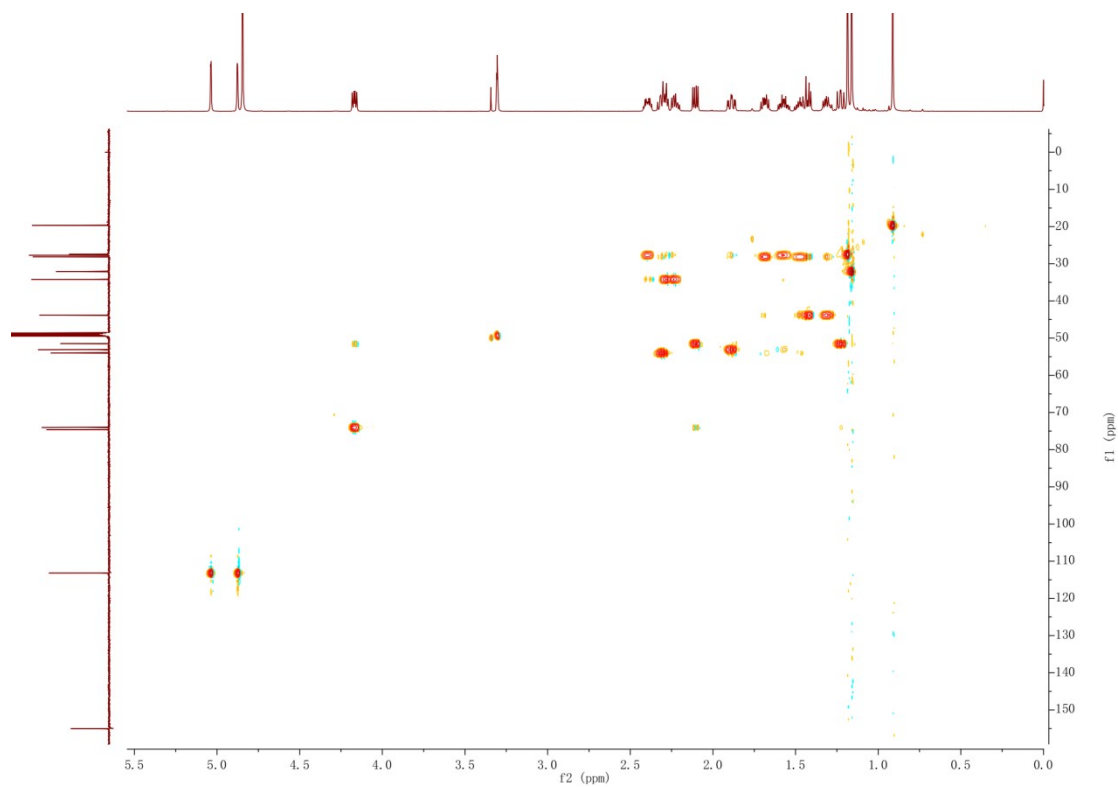

Figure S8-3. The HSQC spectrum of **7**

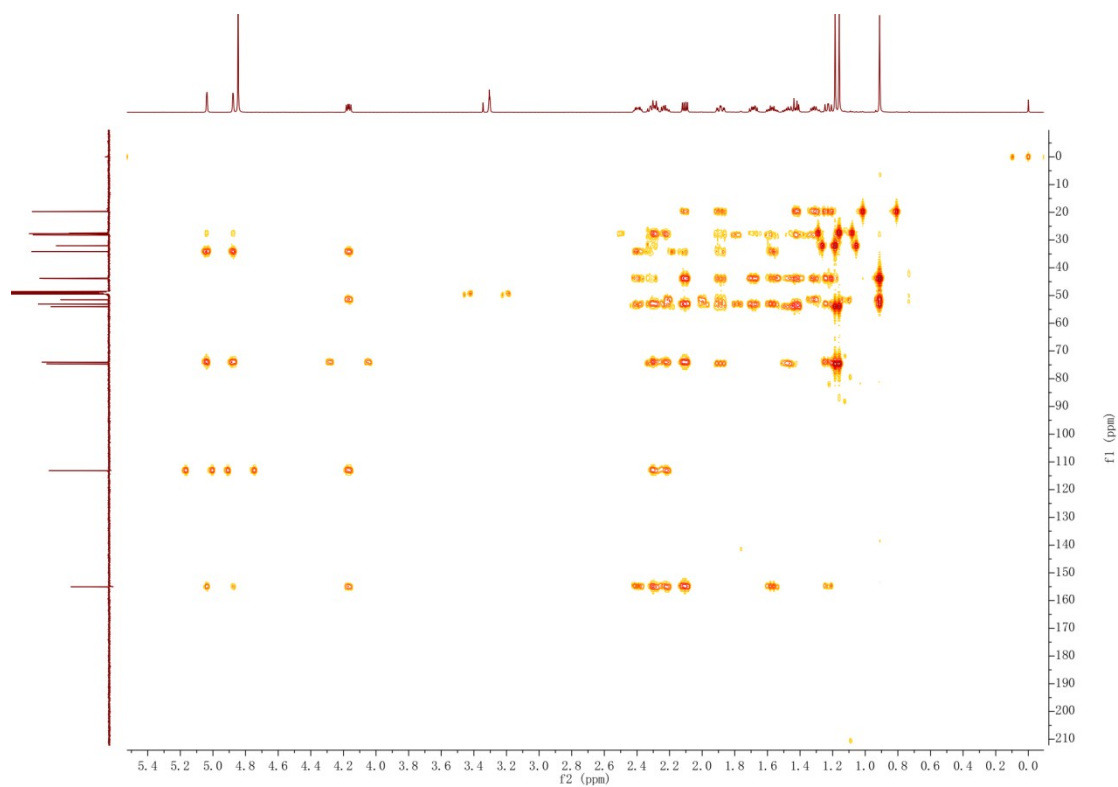

Figure S8-4. The HMBC spectrum of **7**

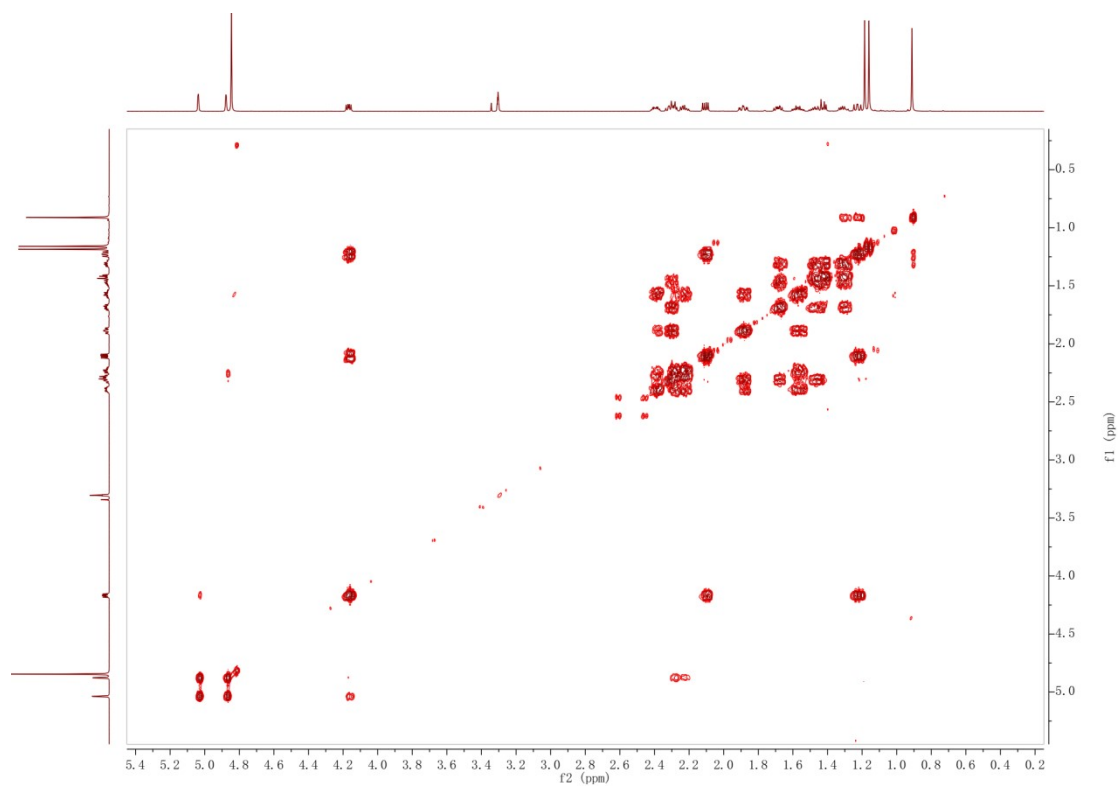

Figure S8-5. The  $^1\text{H}$ - $^1\text{H}$  COSY spectrum of **7**

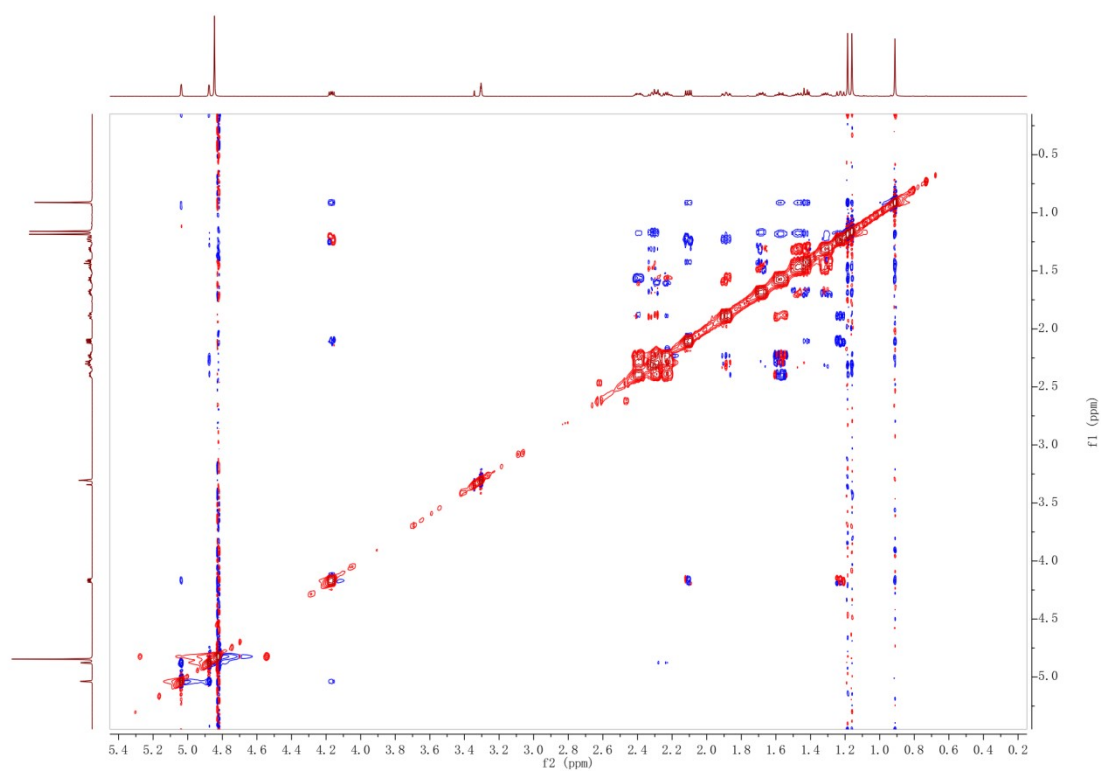

Figure S8-6. The ROESY spectrum of **7**

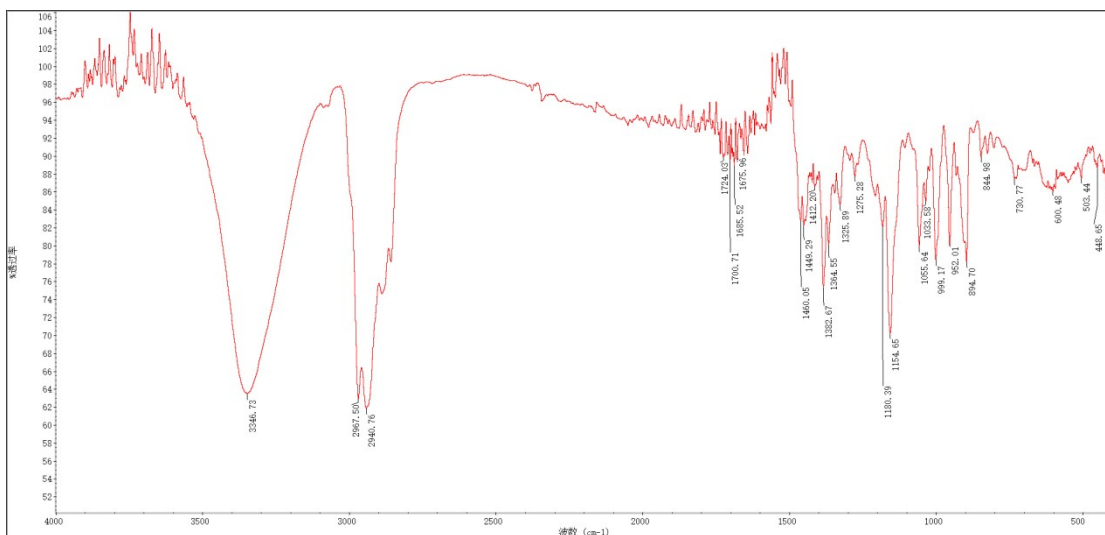

Figure S8-7. The IR spectrum of **7**

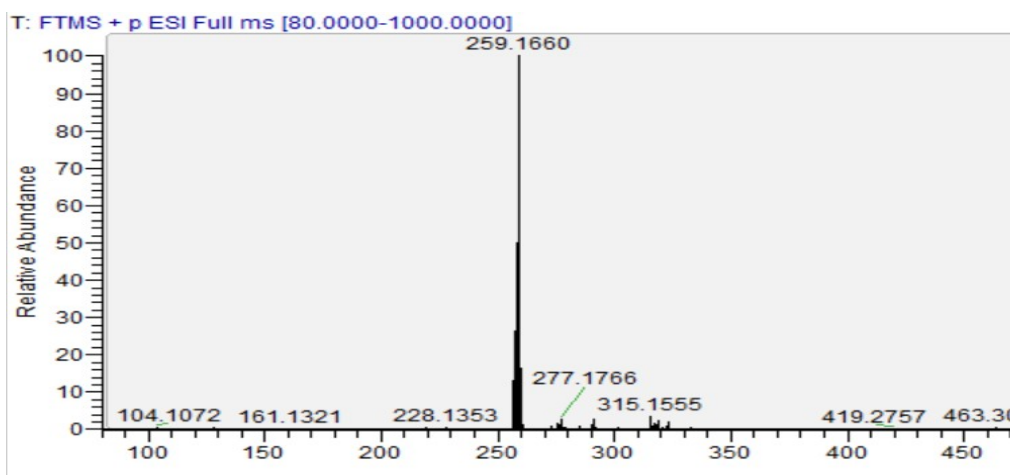

$C_{15}H_{26}O_2Na^+$  Calculated 259.1661 Found 259.1660

Figure S8-8. The HRESIMS spectrum of **7**



| Compounds        | IC <sub>50</sub> (μM) <sup>a</sup> |            |            |            |                              |
|------------------|------------------------------------|------------|------------|------------|------------------------------|
|                  | Huh-7                              | MCF-7      | A549       | MDA-MB-231 | IDH1 <sup>R132h</sup> mutant |
| <b>1</b>         | >100                               | >100       | >100       | >100       | >53.3                        |
| <b>2</b>         | >100                               | 43.38±7.22 | >100       | >100       | >53.3                        |
| <b>3</b>         | >100                               | >100       | >100       | >100       | >53.3                        |
| <b>4</b>         | >100                               | >100       | >100       | >100       | 22.27 ± 0.24                 |
| <b>5</b>         | >100                               | >100       | >100       | >100       | >53.3                        |
| <b>6</b>         | >100                               | >100       | >100       | >100       | >53.3                        |
| <b>7</b>         | >100                               | >100       | >100       | >100       | >53.3                        |
| <b>8</b>         | >100                               | >100       | >100       | >100       | >53.3                        |
| <b>9</b>         | >100                               | >100       | >100       | >100       | >53.3                        |
| <b>10</b>        | 47.03±2.48                         | 38.33±2.04 | 70.48±4.40 | 49.06±1.81 | 13.99 ± 0.37                 |
| DDP              | 7.55±2.94                          | 1.27±0.18  | 3.72±0.66  | 2.84±0.47  |                              |
| <b>Ivosidenb</b> |                                    |            |            |            | 0.051                        |

<sup>a</sup>Values are expressed as the mean ± SD.

Table 1. Cytotoxicity of compounds **1–10** against four tumor cell lines and the IDH1<sup>R132h</sup> mutant

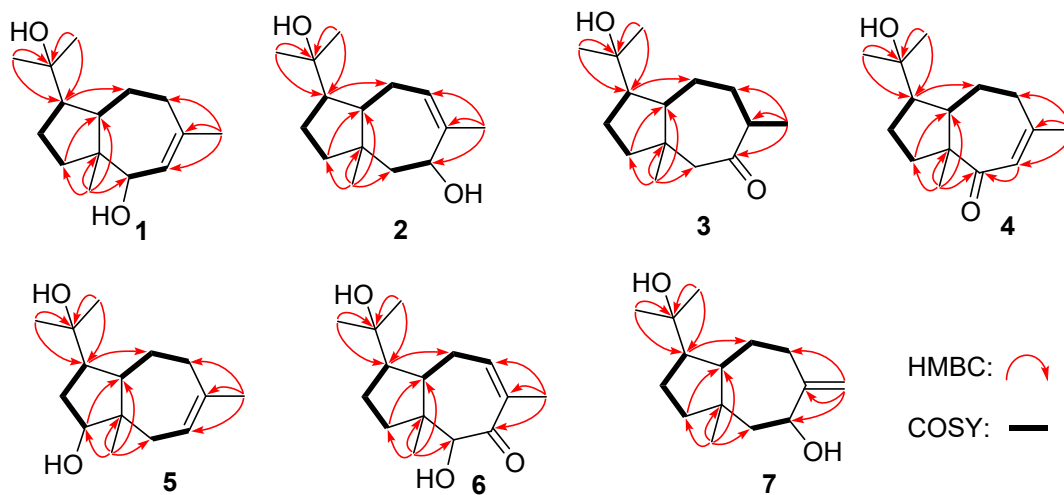

Figure S9. Key  $^1\text{H}$ - $^1\text{H}$  and HMBC correlations of 1-7

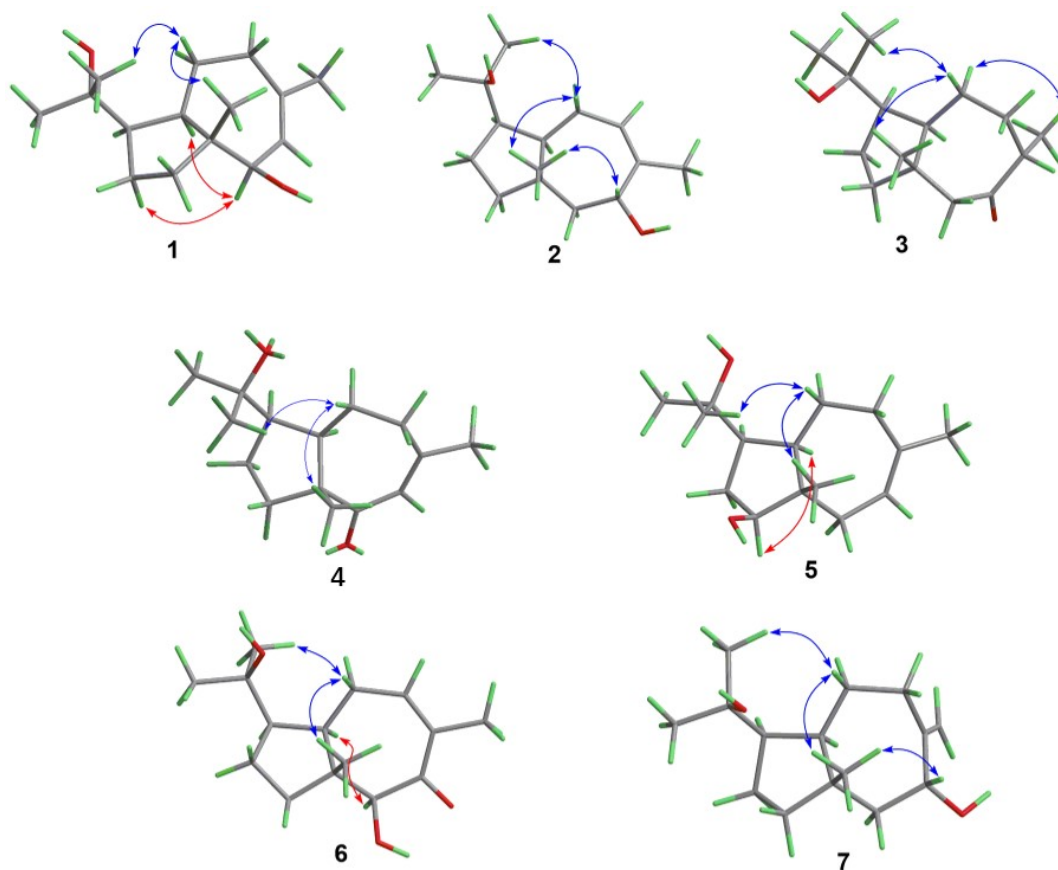

Figure S10. Key ROESY correlations of 1-7

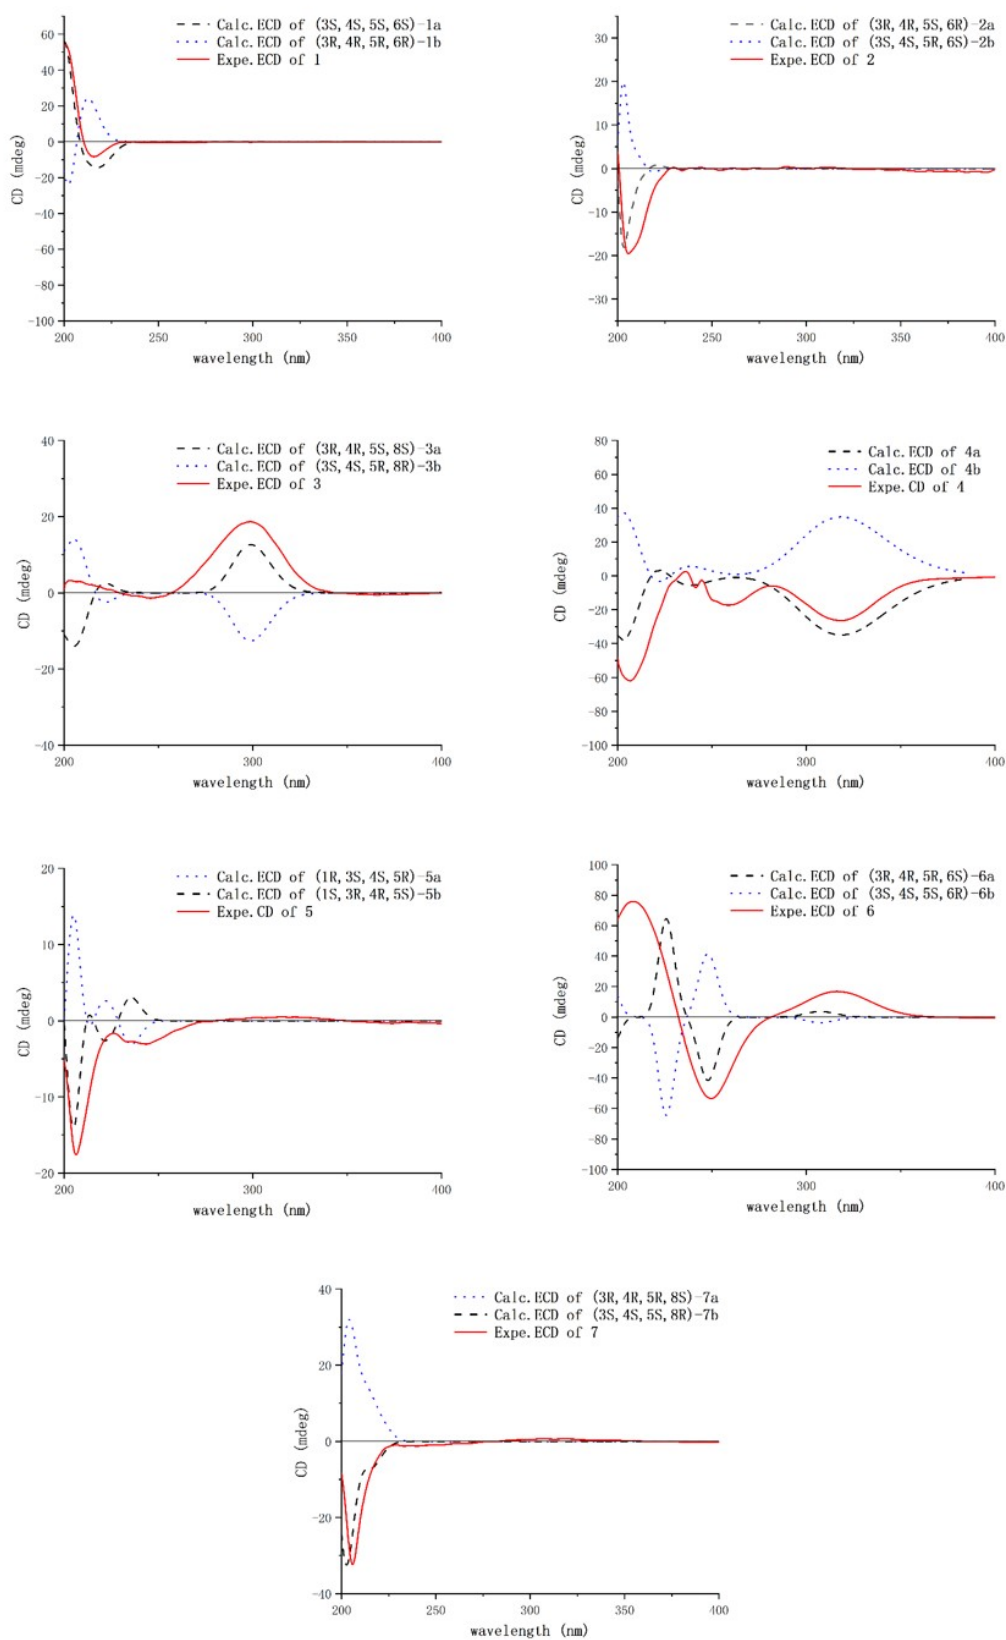

Figure S11. Calculated and experimental electronic circular dichroism (ECD) spectra of 1-7
